# Supplementary material for: Visible-light-induced bromoetherification of alkenols for the synthesis of β-bromotetrahydrofurans and -tetrahydropyrans
Source: publisher site journal article supplement (doi:10.3762/bjoc.11.5), 2015-01-08

## Supporting information

for

# Visible-light-induced bromoetherification of alkenols for the synthesis of $\beta$ -bromotetrahydrofurans and -tetrahydropyrans

Run Lin, Hongnan Sun, Chao Yang\*, Youdong Yang, Xinxin Zhao and Wujiong Xia\*

Address: State Key Lab of Urban Water Resource and Environment, the Academy of Fundamental and Interdisciplinary Sciences, Harbin Institute of Technology, Harbin 150080, P. R. China

Email: Chao Yang\* - xyyang@hit.edu.cn; Wujiong Xia\* - xiawj@hit.edu.cn

\*Corresponding author

### Additional experimental data and $^1\text{H}$ and $^{13}\text{C}$ NMR spectra for products

## Contents

|                                                                                  |     |
|----------------------------------------------------------------------------------|-----|
| 1. General information.....                                                      | S2  |
| 2. Preparation and characterization of alkenols.....                             | S2  |
| 3. General procedure for photocatalytic bromoetherification of alkenols.....     | S8  |
| 4. Stereochemical determination of $\beta$ -bromotetrahydrofuran <b>2a</b> ..... | S9  |
| 5. Characterization of photocatalytic bromoetherification products.....          | S11 |
| 6. $^1\text{H}$ and $^{13}\text{C}$ NMR spectra.....                             | S20 |

## 1. General information

All reagents were purchased from commercial sources unless otherwise noted. Solvent was freshly distilled prior to use unless otherwise noted. Reactions were monitored by thin-layer chromatography (TLC) and visualized by UV-light (254 nm) or by treatment with a solution of 10 g phosphomolybdic acid and 100 mL EtOH followed by heating.  $^1\text{H}$  NMR (400 MHz) and  $^{13}\text{C}$  NMR (100 MHz) spectra were obtained on Bruker AV-400 instrument. Chemical shifts for  $^1\text{H}$  NMR spectra were reported in  $\delta$  ppm referenced to an internal  $\text{SiMe}_4$  standard. Chemical shifts for  $^{13}\text{C}$  NMR spectra were reported in parts per million relative to the center line signal of the  $\text{CDCl}_3$  triplet at 77.0 ppm. HR-ESI-MS spectra were recorded on a Bruker Esquire LC mass spectrometer using electrospray ionization.

## 2. Preparation and characterization of alkenols

Alkenols **1a-s** were prepared according to reported method<sup>[1]</sup>.

### (*E*)-4-(4-methoxyphenyl)but-3-en-1-ol (**1a**)

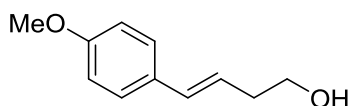

$^1\text{H}$ NMR ( $\text{CDCl}_3$ , 400 MHz):  $\delta$  7.27 (d,  $J = 8.7$  Hz, 2H), 6.82 (d,  $J = 8.7$  Hz, 2H), 6.40 (d,  $J = 15.9$  Hz, 1H), 6.03 (dt,  $J = 15.7, 7.1$  Hz, 1H), 3.77 (s, 3H), 3.69 (t,  $J = 6.4$  Hz, 2H), 2.42 (td,  $J = 7.3, 1.0$  Hz, 2H), 2.18 (brs, 1H). Data are consistent with literature values.<sup>[1]</sup>

### (*E*)-4-(3-methoxyphenyl)but-3-en-1-ol (**1b**)

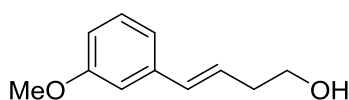

$^1\text{H}$ NMR ( $\text{CDCl}_3$ , 400 MHz):  $\delta$  7.21 (t,  $J = 7.9$  Hz, 1H), 6.95 (d,  $J = 7.7$  Hz, 1H), 6.89 (s, 1H), 6.77 (dd,  $J = 8.2, 2.4$  Hz, 1H), 6.45 (d,  $J = 15.9$  Hz, 1H), 6.23-6.16 (m, 1H), 3.80 (s, 1H), 3.74 (t,  $J = 6.3$  Hz, 2H), 2.47 (q,  $J = 6.5$  Hz, 2H), 1.84 (brs, 1H). Data are

<sup>1</sup> Zeng, X. H.; Miao, C. X.; Wang, S. F.; Xia, C. G.; Sun, W. *Chem. Commun.* 2013, 49, 2418.

consistent with literature values.<sup>[1]</sup>

**(E)-4-(2-methoxyphenyl)but-3-en-1-ol (1c)**

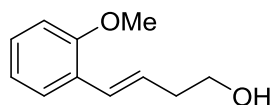

<sup>1</sup>HNMR (CDCl<sub>3</sub>, 400 MHz):  $\delta$  7.43-7.40 (m, 1H), 7.26-7.18 (m, 1H), 6.95-6.79 (m, 3H), 6.19 (dt,  $J = 15.9, 7.2$  Hz, 1H), 3.84 (s, 3H), 3.76-3.69 (m, 2H), 2.53-2.47 (m, 2H), 1.68 (brs, 1H). Data are consistent with literature values.<sup>[1]</sup>

**(E)-4-phenylbut-3-en-1-ol (1d)**

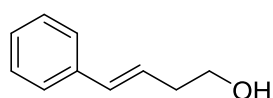

<sup>1</sup>HNMR (CDCl<sub>3</sub>, 400 MHz):  $\delta$  7.36-7.19 (m, 5H), 6.48 (d,  $J = 15.9$  Hz, 1H), 6.20 (dt,  $J = 15.8, 7.1$  Hz, 1H), 3.76-3.73 (m, 2H), 2.50-2.45 (m, 2H), 1.81 (brs, 1H). Data are consistent with literature values.<sup>[1]</sup>

**(E)-4-*p*-tolylbut-3-en-1-ol (1e)**

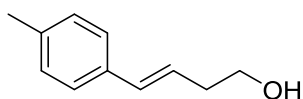

<sup>1</sup>HNMR (CDCl<sub>3</sub>, 400 MHz):  $\delta$  7.16 (d,  $J = 8.0$  Hz, 2H), 7.01 (d,  $J = 8.0$  Hz, 2H), 6.36 (d,  $J = 15.9$  Hz, 1H), 6.05 (dt,  $J = 15.8, 7.1$  Hz, 1H), 3.64-3.60 (m, 2H), 2.36 (td,  $J = 7.3, 0.9$  Hz, 2H), 2.23 (s, 3H), 2.00 (brs, 1H). Data are consistent with literature values.<sup>[1]</sup>

**(E)-4-*m*-tolylbut-3-en-1-ol (1f)**

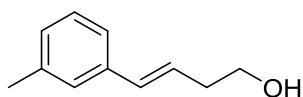

<sup>1</sup>HNMR (CDCl<sub>3</sub>, 400 MHz):  $\delta$  7.24-7.14 (m, 3H), 7.03 (d,  $J = 7.0$  Hz, 1H), 6.46 (d,  $J = 15.9$  Hz, 1H), 6.18 (dt,  $J = 15.7, 7.1$  Hz, 1H), 3.73 (t,  $J = 6.3$  Hz, 2H), 2.49-2.44 (m, 2H), 2.33 (s, 3H), 1.66 (brs, 1H). Data are consistent with literature values.<sup>[1]</sup>

**(E)-4-*o*-tolylbut-3-en-1-ol (1g)**

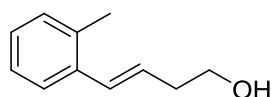

<sup>1</sup>HNMR (CDCl<sub>3</sub>, 400 MHz):  $\delta$  7.16-7.12 (m, 4H), 6.68 (d,  $J = 15.7$  Hz, 1H), 6.06 (dt,

$J = 15.5, 7.2$  Hz, 1H), 3.73 (t,  $J = 6.4$  Hz, 2H), 2.49 (td,  $J = 7.6, 1.3$  Hz, 2H), 2.33 (s, 3H), 1.81 (brs, 1H). Data are consistent with literature values.<sup>[1]</sup>

**(E)-4-(4-bromophenyl)but-3-en-1-ol (1h)**

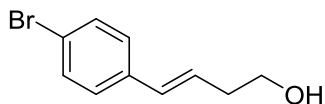

<sup>1</sup>HNMR (CDCl<sub>3</sub>, 400 MHz):  $\delta$  7.41 (d,  $J = 8.4$  Hz, 2H), 7.20 (d,  $J = 8.4$  Hz, 2H), 6.41 (d,  $J = 15.9$  Hz, 1H), 6.19 (dt,  $J = 15.7, 7.1$  Hz, 1H), 3.76-3.73 (m, 2H), 2.48-2.43 (m, 2H), 1.72 (brs, 1H). Data are consistent with literature values.<sup>[1]</sup>

**(E)-4-(3-bromophenyl)but-3-en-1-ol (1i)**

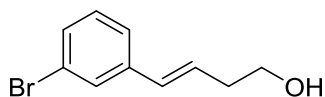

<sup>1</sup>HNMR (CDCl<sub>3</sub>, 400 MHz):  $\delta$  7.50 (s, 1H), 7.32 (d,  $J = 7.9$  Hz, 1H), 7.26-7.23 (m, 1H), 7.15 (t,  $J = 7.8$  Hz, 1H), 6.40 (d,  $J = 15.9$  Hz, 1H), 6.21 (dt,  $J = 15.8, 7.1$  Hz, 1H), 3.74 (t,  $J = 6.3$  Hz, 2H), 2.47 (td,  $J = 7.3, 1.1$  Hz, 1H), 1.83 (brs, 1H). Data are consistent with literature values.<sup>[2]</sup>

**(E)-4-(2-bromophenyl)but-3-en-1-ol (1j)**

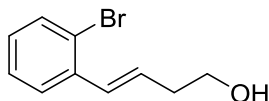

<sup>1</sup>HNMR (CDCl<sub>3</sub>, 400 MHz):  $\delta$  7.33-7.24 (m, 4H), 6.43 (d,  $J = 15.9$  Hz, 1H), 6.18 (dt,  $J = 15.7, 7.1$  Hz, 1H), 3.75 (t,  $J = 6.3$  Hz, 2H), 2.50-2.45 (m, 2H), 1.84 (brs, 1H). Data are consistent with literature values.<sup>[2]</sup>

**(E)-4-(4-fluorophenyl)but-3-en-1-ol (1k)**

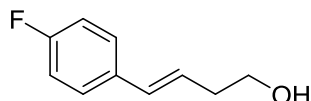

<sup>1</sup>HNMR (CDCl<sub>3</sub>, 400 MHz):  $\delta$  7.32-7.29 (m, 2H), 6.98 (t,  $J = 8.7$  Hz, 2H), 6.44 (d,  $J = 15.9$  Hz, 1H), 6.15-6.07 (m, 1H), 3.74 (t,  $J = 6.3$  Hz, 2H), 2.49-2.44 (m, 3H). Data are consistent with literature values.<sup>[1]</sup>

<sup>2</sup> Zeng, X. H.; Miao, C. X.; Wang, S. F.; Xia, C. G.; Sun, W. *Synthesis*, 2013, 45, 2391.

**(E)-4-(4-nitrophenyl)but-3-en-1-ol (1l)**

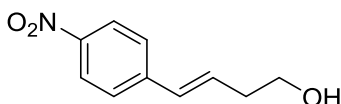

$^1\text{H NMR}$  ( $\text{CDCl}_3$ , 400 MHz):  $\delta$  8.14 (d,  $J = 8.4$  Hz, 2H), 7.47 (d,  $J = 8.4$  Hz, 2H), 6.56 (d,  $J = 16.0$  Hz, 1H), 6.49-6.42 (m, 1H), 3.81 (t,  $J = 6.1$  Hz, 2H), 2.54 (q,  $J = 6.0$  Hz, 2H), 1.79 (brs, 1H).  $^{13}\text{C NMR}$  ( $\text{CDCl}_3$ , 100 MHz):  $\delta$  146.5, 143.7, 132.1, 130.5, 126.5, 123.9, 61.6, 36.4.

**(E)-4-(2,4-dimethoxyphenyl)but-3-en-1-ol (1m)**

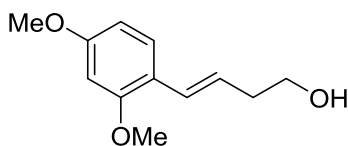

$^1\text{H NMR}$  ( $\text{CDCl}_3$ , 400 MHz):  $\delta$  7.35 (d,  $J = 8.3$  Hz, 1H), 6.74 (d,  $J = 16.0$  Hz, 1H), 6.50-6.45 (m, 2H), 6.10 (dt,  $J = 15.9, 7.2$  Hz, 1H), 3.84 (s, 3H), 3.83 (s, 3H), 3.75 (t,  $J = 6.3$  Hz, 2H), 2.53-2.47 (m, 2H), 1.74 (brs, 1H);  $^{13}\text{C NMR}$  ( $\text{CDCl}_3$ , 100 MHz):  $\delta$  160.1, 157.4, 127.2, 127.2, 124.7, 119.4, 104.7, 98.38, 62.1, 55.4, 55.3, 36.8.

**(E)-4-(2,5-dimethoxyphenyl)but-3-en-1-ol (1n)**

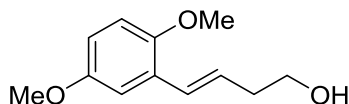

$^1\text{H NMR}$  ( $\text{CDCl}_3$ , 400 MHz):  $\delta$  6.85 (d,  $J = 2.8$  Hz, 1H), 6.78 (dd,  $J = 8.5, 5.8$  Hz, 1H), 6.63 (d,  $J = 11.6$  Hz, 1H), 5.75 (dt,  $J = 11.6, 7.5$  Hz, 1H), 3.78 (s, 3H), 3.77 (s, 3H), 3.71 (t,  $J = 6.4$  Hz, 2H), 2.51 (dd,  $J = 7.5, 1.5$  Hz, 2H), 1.72 (brs, 1H).

**(E)-4-(5-chloro-2-methoxyphenyl)but-3-en-1-ol (1o)**

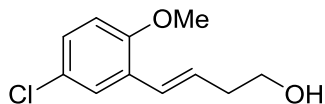

$^1\text{H NMR}$  ( $\text{CDCl}_3$ , 400 MHz):  $\delta$  7.38 (d,  $J = 2.5$  Hz, 1H), 7.13 (dd,  $J = 8.7, 2.5$  Hz, 1H), 6.78-6.72 (m, 2H), 6.23-6.16 (m, 1H), 3.81 (s, 3H), 3.75 (t,  $J = 6.3$  Hz, 2H), 2.49 (d,  $J = 6.8$  Hz, 2H), 1.67 (brs, 1H).

**(E)-4-(2-methoxynaphthalen-1-yl)but-3-en-1-ol (1p)**

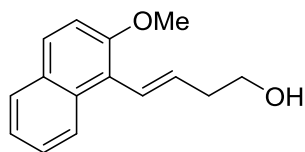

$^1\text{H}$ NMR ( $\text{CDCl}_3$ , 400 MHz):  $\delta$  8.02 (d,  $J = 8.6$  Hz, 1H), 7.68 (t,  $J = 8.4$  Hz, 1H), 7.63 (d,  $J = 9.0$  Hz, 1H), 7.34 (t,  $J = 7.2$  Hz, 1H), 7.24 (dd,  $J = 12.8, 5.9$  Hz, 1H), 7.16 (t,  $J = 8.6$  Hz, 1H), 6.73 (d,  $J = 16.1$  Hz, 1H), 6.02 (dt,  $J = 15.9, 7.0$  Hz, 1H), 3.82 (s, 3H), 3.70 (t,  $J = 6.3$  Hz, 2H), 2.52 (q,  $J = 6.2$  Hz, 2H).  $^{13}\text{C}$  NMR ( $\text{CDCl}_3$ , 100 MHz):  $\delta$  153.0, 131.9, 130.6, 128.2, 127.4, 127.2, 125.3, 124.8, 123.3, 122.4, 119.8, 112.1, 60.8, 55.4, 36.3.

**(E)-4-(4-((tert-butyl-diphenylsilyloxy)phenyl)phenyl)pent-3-en-1-ol (1q)**

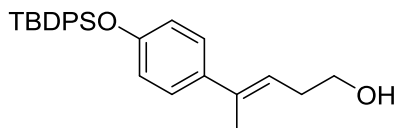

$^1\text{H}$ NMR ( $\text{CDCl}_3$ , 400 MHz):  $\delta$  7.66 (dd,  $J = 7.9, 1.4$  Hz, 4H), 7.34 (dd,  $J = 5.0, 3.6$  Hz, 2H), 7.29 (t,  $J = 7.1$  Hz, 4H), 6.86 (d,  $J = 8.6$  Hz, 2H), 6.65 (d,  $J = 8.6$  Hz, 2H), 5.30 (td,  $J = 7.3, 1.2$  Hz, 1H), 3.50 (t,  $J = 6.5$  Hz, 2H), 2.15 (q,  $J = 6.5$  Hz, 2H), 1.90 (s, 3H), 1.04 (s, 9H);  $^{13}\text{C}$  NMR (100 MHz,  $\text{CDCl}_3$ ):  $\delta$  154.3, 139.0, 135.59, 134.2, 133.0, 129.8, 128.7, 127.7, 122.4, 119.3, 62.7, 35.4, 32.6, 26.5, 19.4.

**4,4-bis(4-methoxyphenyl)but-3-en-1-ol (1r)**

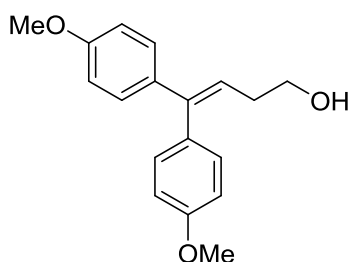

$^1\text{H}$ NMR ( $\text{CDCl}_3$ , 400 MHz):  $\delta$  7.18-7.14 (m, 2H), 7.12-7.09 (m, 2H), 6.92-6.88 (m, 2H), 6.81-6.78 (m, 2H), 5.96 (t,  $J = 7.5$  Hz, 1H), 3.83 (s, 3H), 3.78 (s, 3H), 3.70 (t,  $J = 6.6$  Hz, 2H), 2.40 (dd,  $J = 14.0, 6.7$  Hz, 2H);  $^{13}\text{C}$  NMR ( $\text{CDCl}_3$ , 100 MHz):  $\delta$  158.8, 158.6, 143.4, 135.5, 132.3, 131.0, 128.4, 123.2, 113.6, 113.4, 62.7, 55.3, 55.2, 33.3.

**(E)-4-(4-methoxyphenyl)-2,2-dimethylbut-3-en-1-ol (1s)**

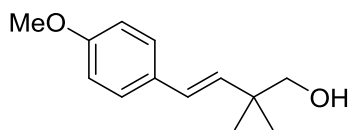

$^1\text{H}$ NMR ( $\text{CDCl}_3$ , 400 MHz):  $\delta$  7.12 (d,  $J = 8.2$  Hz, 2H), 6.83 (d,  $J = 8.6$  Hz, 2H), 6.54 (d,  $J = 12.6$  Hz, 1H), 5.50 (d,  $J = 12.6$  Hz, 1H), 3.79 (s, 3H), 3.31 (s, 2H), 0.97 (s, 6H).  $^{13}\text{C}$  NMR ( $\text{CDCl}_3$ , 100 MHz):  $\delta$  158.3, 138.2, 129.7, 127.2, 113.9, 113.1, 71.9, 55.1, 39.5, 25.7.

Alkenols **1t-w** were prepared according to reported method.<sup>[3]</sup>

**(E)-5-(4-methoxyphenyl)pent-4-en-1-ol (1t)**

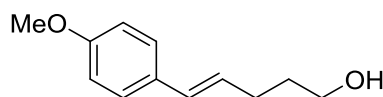

$^1\text{H}$ NMR ( $\text{CDCl}_3$ , 400 MHz):  $\delta$  7.21 (d,  $J = 8.7$  Hz, 2H), 6.86 (d,  $J = 8.7$  Hz, 2H), 6.34 (d,  $J = 11.0$  Hz, 1H), 6.06 (dt,  $J = 15.8, 6.9$  Hz, 1H), 3.79 (s, 3H), 3.64 (t,  $J = 5.7$  Hz, 2H), 3.44 (brs, 1H), 2.43-2.37 (m, 1.8 Hz, 2H), 1.75-1.67 (m, 2H). Data are consistent with literature values.<sup>[4]</sup>

**(E)-5-*p*-tolylpent-4-en-1-ol (1u)**

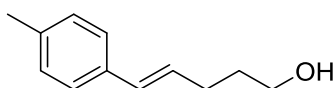

$^1\text{H}$ NMR ( $\text{CDCl}_3$ , 400 MHz):  $\delta$  7.23 (d,  $J = 8.1$  Hz, 2H), 7.09 (d,  $J = 7.9$  Hz, 2H), 6.38 (d,  $J = 15.8$  Hz, 1H), 6.16 (dt,  $J = 15.7, 6.9$  Hz, 1H), 3.68 (t,  $J = 6.5$  Hz, 2H), 2.33-2.26 (m, 5H), 1.81-1.69 (m, 3H). Data are consistent with literature values.<sup>[5]</sup>

**(E)-6-(4-methoxyphenyl)hex-5-en-2-ol (1v)**

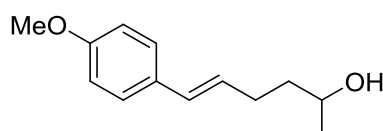

$^1\text{H}$ NMR ( $\text{CDCl}_3$ , 400 MHz):  $\delta$  7.27 (d,  $J = 8.1$  Hz, 2H), 6.83 (d,  $J = 8.6$  Hz, 2H), 6.36

<sup>3</sup> Logan, A.W.J.; Parker, J.S.; Hallside, M.S.; Burton J.W. *Org. Lett.* 2012, 14, 2940.

<sup>4</sup> Belanger, G.; Levesque, F.; Paquet, J.; Barbe, G. *J. Org. Chem.* 2005, 70, 291.

<sup>5</sup> Crombie, L.; Wyvill, R. D. *J. Chem. Soc. Perkin Trans. 1* 1985, 1983.

(d,  $J = 16.0$  Hz, 1H), 6.12-6.04 (m, 1H), 3.88-3.83 (m, 1H), 3.79 (s, 3H), 2.34-2.25 (m, 2H), 1.67-1.57 (m, 2H), 1.47 (brs, 1H), 1.22 (d,  $J = 6.2$  Hz, 3H);  $^{13}\text{C}$  NMR ( $\text{CDCl}_3$ , 100 MHz):  $\delta$   $^{13}\text{C}$  NMR (101 MHz,  $\text{CDCl}_3$ )  $\delta$  158.7, 130.5, 129.6, 128.1, 127.0, 113.9, 67.6, 55.3, 38.8, 29.3, 23.5.

**(E)-5-(4-methoxyphenyl)-1-phenylpent-4-en-1-ol (1w)**

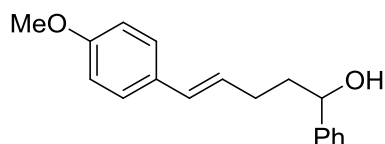

$^1\text{H}$ NMR ( $\text{CDCl}_3$ , 400 MHz):  $\delta$  7.37-7.25 (m, 7H), 6.83 (d,  $J = 8.7$  Hz, 2H), 6.35 (d,  $J = 15.8$  Hz, 1H), 6.08 (dt,  $J = 15.7, 6.9$  Hz, 1H), 4.74 (t,  $J = 6.5$  Hz, 1H), 3.79 (s, 3H), 2.35-2.21 (m, 2H), 2.02-1.85 (m, 3H);  $^{13}\text{C}$  NMR ( $\text{CDCl}_3$ , 100 MHz):  $\delta$  158.7, 144.6, 130.5, 129.8, 128.5, 127.8, 127.6, 127.0, 125.9, 113.9, 74.0, 55.3, 38.6, 29.3.

**1x** was prepared according to reported method.<sup>[6]</sup>

**1-phenylpent-4-en-1-ol (1x)**

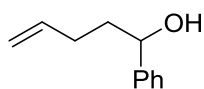

$^1\text{H}$ NMR ( $\text{CDCl}_3$ , 400 MHz):  $\delta$  7.42-7.29 (m, 5H), 5.93-5.83 (m, 1H), 5.11-5.02 (m, 2H), 4.72-4.68 (m, 1H), 2.45-2.08 (m, 3H), 1.97-1.78 (m, 2H). Data are consistent with literature values.<sup>[7]</sup>

### 3. General procedure for photocatalytic bromoetherification of alkenols

**General method:** To a 10 mL round bottom flask equipped with a magnetic stir bar were added alkenols **1** (0.2 mmol),  $\text{CBr}_4$  (132 mg, 0.4 mmol),  $\text{Ru}(\text{bpy})_3\text{Cl}_2$  (4.6 mg, 0.006mmol) and dry DMSO (2 mL). The mixture was irradiated with blue LEDs (1W) at room temperature without degassed for 4 hours. Then water was added and the aqueous layer was extracted with ethyl acetate. The combined organic layers were washed with brine, dried over anhydrous  $\text{Na}_2\text{SO}_4$ , concentrated. The residue was purified by flash column chromatography to give the final product **2**.

<sup>6</sup> Janza, B.; Studer, A. *J. Org. Chem.* 2005, 70, 6991.

<sup>7</sup> Rawal, V.; Singh, S. P.; Dufour, C.; Michoud, C. *J. Org. Chem.* 1993, 58, 7734.



#### 4. Stereochemical determination of $\beta$ -bromotetrahydrofuran 2a

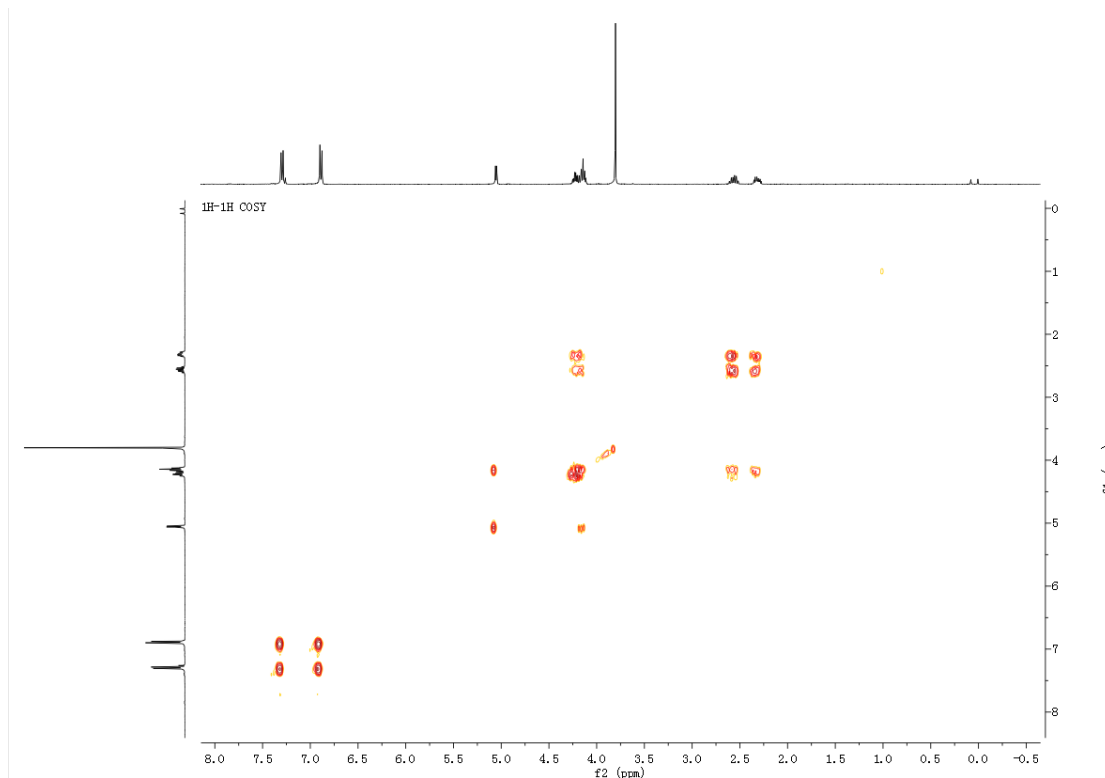

**Fig. 1** COSY spectrum of the product **2a**.

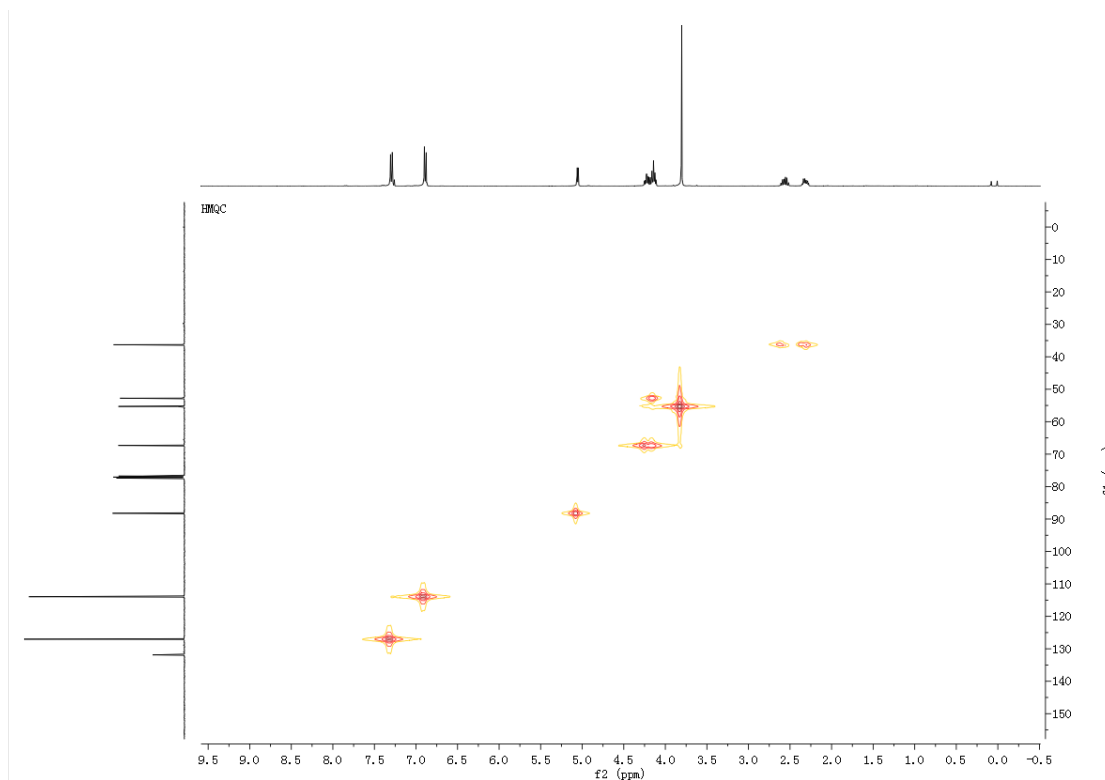

**Fig. 2** HMQC spectrum of the product **2a**.

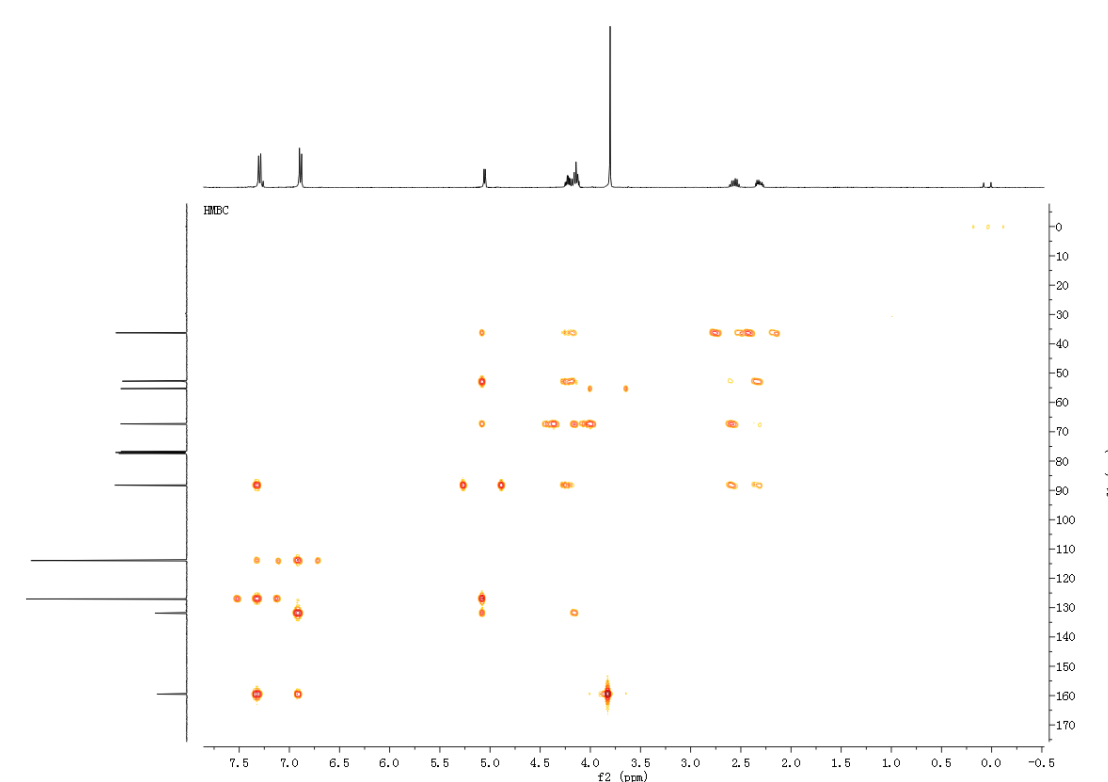

**Fig. 3** HMBC spectrum of the product **2a**.

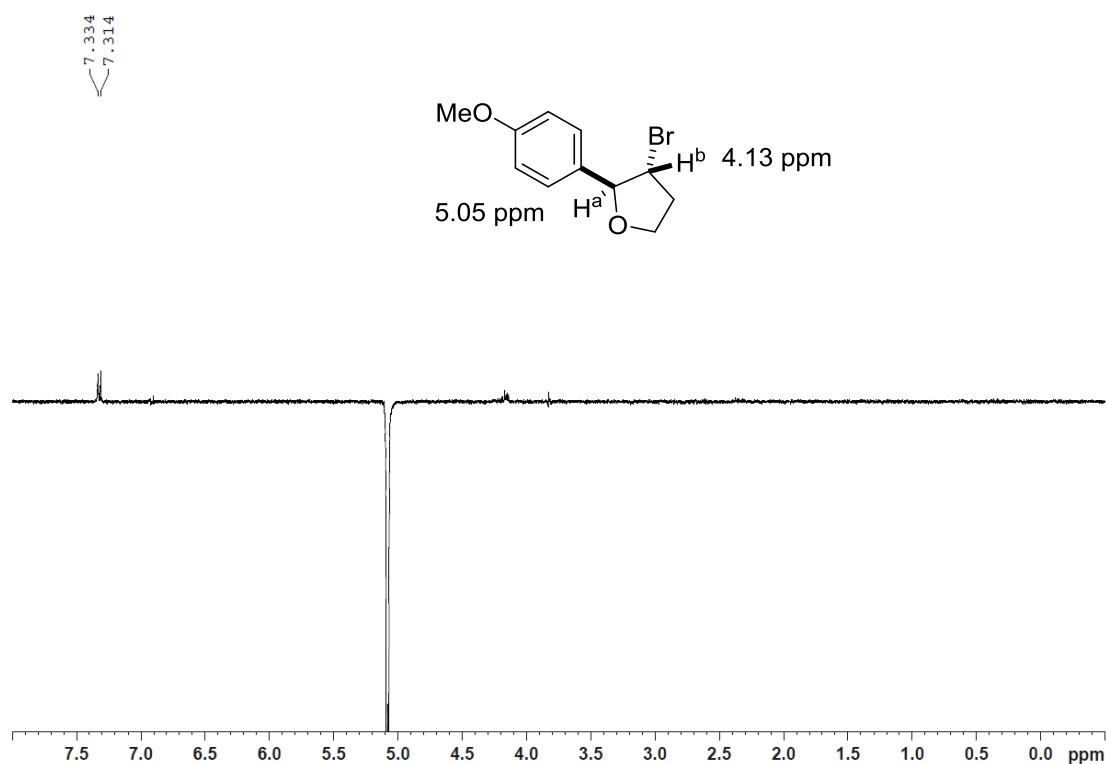

**Fig. 4** NOE spectrum of the product **2a**. (There is no NOE between  $H^a$  and  $H^b$ .)

The NOE data indicate that product **2a** should be *trans* configuration. The stereochemistry of all other products was inferred by analogy.

## 5. Characterization of photocatalytic bromoetherification products

### 3-bromo-2-(4-methoxyphenyl)tetrahydrofuran (2a)

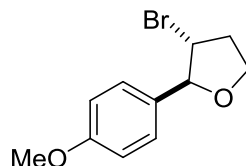

$^1\text{H}$ NMR ( $\text{CDCl}_3$ , 400 MHz):  $\delta$  7.30 (d,  $J = 8.7$  Hz, 2H), 6.89 (d,  $J = 8.7$  Hz, 2H), 5.05 (d,  $J = 5.0$  Hz, 1H), 4.23 (td,  $J = 8.2, 4.1$  Hz, 1H), 4.19-4.10 (m, 2H), 3.80 (s, 3H), 2.56 (dd,  $J = 13.7, 7.3$  Hz, 1H), 2.37-2.26 (m, 1H);  $^{13}\text{C}$  NMR ( $\text{CDCl}_3$ , 100 MHz):  $\delta$  159.5, 131.9, 127.0, 114.0, 88.2, 67.3, 55.3, 52.8, 36.3. HRMS-ESI ( $m/z$ ):  $[\text{M}+\text{H}]^+$  calculated for  $\text{C}_{11}\text{H}_{14}\text{BrO}_2$  257.0177, found 257.0176.

### 3-bromo-2-(3-methoxyphenyl)tetrahydrofuran (2b)

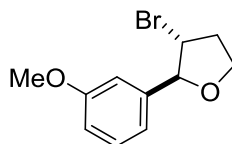

$^1\text{H}$ NMR ( $\text{CDCl}_3$ , 400 MHz):  $\delta$  7.27 (t,  $J = 7.9$  Hz, 2H), 6.94 (dd,  $J = 13.5, 4.8$  Hz, 2H), 6.84 (dd,  $J = 8.1, 2.5$  Hz, 1H), 5.13 (d,  $J = 4.5$  Hz, 1H), 4.29 – 4.15 (m, 3H), 3.82 (s, 3H), 2.54 (dd,  $J = 13.7, 7.0$  Hz, 1H), 2.39 – 2.26 (m, 1H);  $^{13}\text{C}$  NMR ( $\text{CDCl}_3$ , 100 MHz):  $\delta$  159.8, 141.8, 129.6, 117.9, 113.5, 111.2, 88.4, 67.5, 55.3, 52.7, 36.2. HRMS-ESI ( $m/z$ ):  $[\text{M}+\text{H}]^+$  calculated for  $\text{C}_{11}\text{H}_{14}\text{BrO}_2$  257.0177, found 257.0175.

### 3-bromo-2-(2-methoxyphenyl)tetrahydrofuran (2c)

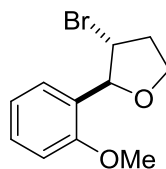

$^1\text{H}$ NMR ( $\text{CDCl}_3$ , 400 MHz):  $\delta$  7.35-7.28 (m, 1H), 7.29-7.23 (m, 1H), 6.95 (t,  $J = 7.4$  Hz, 1H), 6.87 (d,  $J = 8.2$  Hz, 1H), 5.52 (s, 1H), 4.50-4.41 (m, 1H), 4.37-4.23 (m, 2H), 3.88 (s, 3H), 2.44-2.29 (m, 1H), 2.28-2.17 (m, 1H);  $^{13}\text{C}$  NMR ( $\text{CDCl}_3$ , 100 MHz):  $\delta$  156.2, 129.4, 128.9, 126.1, 120.5, 110.2, 85.2, 67.7, 55.4, 53.3, 35.3. HRMS-ESI ( $m/z$ ):  $[\text{M}+\text{H}]^+$  calculated for  $\text{C}_{11}\text{H}_{14}\text{BrO}_2$  257.0177, found 257.0177.

### 3-bromo-2-phenyltetrahydrofuran (2d)

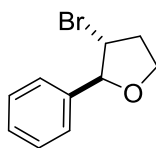

$^1\text{H}$ NMR ( $\text{CDCl}_3$ , 400 MHz):  $\delta$  7.43-7.33 (m, 4H), 7.32 (dd,  $J = 5.8, 2.9$  Hz, 1H), 5.14 (d,  $J = 4.7$  Hz, 1H), 4.26 (td,  $J = 8.2, 4.0$  Hz, 1H), 4.23-4.15 (m, 2H), 2.56 (dd,  $J = 13.8, 7.2$  Hz, 1H), 2.40-2.26 (m, 1H), 2.28-2.17 (m, 1H);  $^{13}\text{C}$  NMR ( $\text{CDCl}_3$ , 100 MHz):  $\delta$  140.0, 128.5, 128.1, 125.6, 88.5, 67.5, 52.7, 36.2. HRMS-ESI ( $m/z$ ):  $[\text{M}+\text{H}]^+$  calculated for  $\text{C}_{10}\text{H}_{12}\text{BrO}$  227.0072, found 227.0070. Data are consistent with literature values.[<sup>8</sup>]

### 3-bromo-2-*p*-tolyltetrahydrofuran (2e)

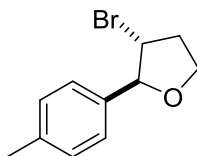

$^1\text{H}$ NMR ( $\text{CDCl}_3$ , 400 MHz):  $\delta$  7.26 (d,  $J = 7.9$  Hz, 2H), 7.17 (d,  $J = 7.9$  Hz, 2H), 5.10 (d,  $J = 4.7$  Hz, 1H), 4.30-4.20 (m, 1H), 4.20-4.12 (m, 2H), 2.64-2.45(m, 1H), 2.35 (s, 3H), 2.33-2.27 (m, 1H);  $^{13}\text{C}$  NMR ( $\text{CDCl}_3$ , 100 MHz):  $\delta$  137.8, 137.0, 129.2, 125.5, 88.4, 67.4, 52.8, 36.2, 21.1. HRMS-ESI ( $m/z$ ):  $[\text{M}+\text{H}]^+$  calculated for  $\text{C}_{11}\text{H}_{14}\text{BrO}$  241.0228, found 241.0230.

### 3-bromo-2-*m*-tolyltetrahydrofuran (2f)

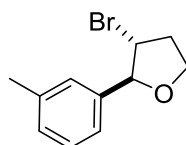

$^1\text{H}$ NMR ( $\text{CDCl}_3$ , 400 MHz):  $\delta$  7.28 (dd,  $J = 6.7, 4.7$  Hz, 1H), 7.24 (d,  $J = 7.5$  Hz, 1H), 7.17 (d,  $J = 8.9$  Hz, 2H), 7.12 (d,  $J = 7.4$  Hz, 1H), 5.11 (d,  $J = 4.6$  Hz, 1H), 4.26 (td,  $J = 8.2, 4.0$  Hz, 1H), 4.22-4.16 (m, 2H), 2.55 (dt,  $J = 15.1, 8.0$  Hz, 1H), 2.36 (s, 3H), 2.35-2.24 (m, 1H);  $^{13}\text{C}$  NMR ( $\text{CDCl}_3$ , 100 MHz):  $\delta$  139.9, 138.2, 128.8, 128.4, 126.2, 122.8, 88.6, 67.5, 52.8, 36.2, 21.4. HRMS-ESI ( $m/z$ ):  $[\text{M}+\text{H}]^+$  calculated for  $\text{C}_{11}\text{H}_{14}\text{BrO}$  241.0228, found 241.0230.

<sup>8</sup> Crich, D.; Sartillo-Piscil, F.; Quintero-Cortes, L.; Wink, D. J. *J. Org. Chem.* 2002, 67, 3360-3364.

### 3-bromo-2-*o*-tolyltetrahydrofuran (2g)

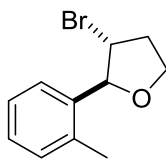

$^1\text{H}$ NMR ( $\text{CDCl}_3$ , 400 MHz):  $\delta$  7.33 (dd,  $J = 5.1, 3.9$  Hz, 1H), 7.20 (dd,  $J = 5.9, 3.3$  Hz, 2H), 7.17 (dd,  $J = 8.1, 3.7$  Hz, 2H), 5.44 (d,  $J = 2.5$  Hz, 1H), 4.38 (td,  $J = 8.2, 2.2$  Hz, 1H), 4.33-4.22 (m, 2H), 2.54-2.44 (m, 1H), 2.24 (s, 3H), 2.28 (ddt,  $J = 13.9, 5.7, 2.3$  Hz, 1H);  $^{13}\text{C}$  NMR ( $\text{CDCl}_3$ , 100 MHz):  $\delta$  139.2, 134.9, 130.4, 127.8, 126.1, 124.9, 86.7, 67.9, 52.9, 35.6, 19.6. HRMS-ESI ( $m/z$ ):  $[\text{M}+\text{H}]^+$  calculated for  $\text{C}_{11}\text{H}_{14}\text{BrO}$  241.0228, found 241.0227.

### 3-bromo-2-(4-bromophenyl)tetrahydrofuran (2h)

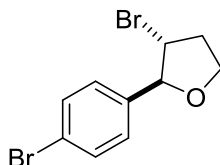

$^1\text{H}$ NMR ( $\text{CDCl}_3$ , 400 MHz):  $\delta$  7.48 (d,  $J = 8.4$  Hz, 2H), 7.27 (d,  $J = 8.2$  Hz, 2H), 5.05 (d,  $J = 5.1$  Hz, 1H), 4.23 (td,  $J = 8.2, 4.3$  Hz, 1H), 4.17 (dd,  $J = 15.5, 8.2$  Hz, 1H), 4.08 (dt,  $J = 7.0, 4.9$  Hz, 1H), 2.54 (td,  $J = 15.1, 7.7$  Hz, 1H), 2.39-2.25 (m, 1H);  $^{13}\text{C}$  NMR ( $\text{CDCl}_3$ , 100 MHz):  $\delta$  139.0, 131.8, 127.4, 122.0, 87.8, 67.5, 52.1, 36.3. HRMS-ESI ( $m/z$ ):  $[\text{M}+\text{H}]^+$  calculated for  $\text{C}_{10}\text{H}_{11}\text{Br}_2\text{O}$  306.9156, found 306.9158.

### 3-bromo-2-(3-bromophenyl)tetrahydrofuran (2i)

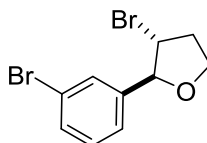

$^1\text{H}$ NMR ( $\text{CDCl}_3$ , 400 MHz):  $\delta$  7.54 (s, 1H), 7.44 (d,  $J = 7.9$  Hz, 1H), 7.31 (d,  $J = 7.7$  Hz, 1H), 7.22 (t,  $J = 7.8$  Hz, 2H), 5.08 (d,  $J = 4.8$  Hz, 1H), 4.31-4.08 (m, 3H), 2.53 (dt,  $J = 15.0, 7.5$  Hz, 1H), 2.39-2.27 (m, 1H);  $^{13}\text{C}$  NMR ( $\text{CDCl}_3$ , 100 MHz):  $\delta$  142.4, 131.2, 130.1, 128.7, 124.4, 122.8, 87.7, 67.6, 52.2, 36.3. HRMS-ESI ( $m/z$ ):  $[\text{M}+\text{H}]^+$  calculated for  $\text{C}_{10}\text{H}_{11}\text{Br}_2\text{O}$  306.9156, found 306.9153.

### 3-bromo-2-(2-bromophenyl)tetrahydrofuran (2j)

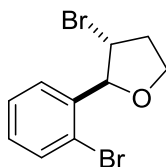

$^1\text{H}$ NMR ( $\text{CDCl}_3$ , 400 MHz):  $\delta$  7.56 (d,  $J = 7.9$  Hz, 1H), 7.43-7.27 (m, 2H), 7.21-7.12 (m, 1H), 5.54 (s, 1H), 4.50-4.32 (m, 3H), 2.54-2.20 (m, 2H);  $^{13}\text{C}$  NMR ( $\text{CDCl}_3$ , 100 MHz):  $\delta$  140.7, 132.9, 129.4, 127.5, 127.1, 121.8, 88.5, 68.5, 53.0, 34.7. HRMS-ESI ( $m/z$ ):  $[\text{M}+\text{H}]^+$  calculated for  $\text{C}_{10}\text{H}_{11}\text{Br}_2\text{O}$  306.9156, found 306.9157.

### 3-bromo-2-(4-fluorophenyl)tetrahydrofuran (2k)

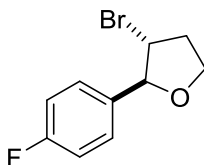

$^1\text{H}$ NMR ( $\text{CDCl}_3$ , 400 MHz):  $\delta$  7.36 (dd,  $J = 8.5, 5.4$  Hz, 2H), 7.04 (t,  $J = 8.7$  Hz, 2H), 5.06 (d,  $J = 5.2$  Hz, 1H), 4.28-4.20 (m, 1H), 4.20-4.13 (m, 1H), 4.10 (dt,  $J = 7.0, 5.0$  Hz, 3H), 2.56 (dd,  $J = 13.7, 7.4$  Hz, 1H), 2.38-2.25 (m, 1H);  $^{13}\text{C}$  NMR ( $\text{CDCl}_3$ , 100 MHz):  $\delta$  163.8, 161.3, 135.6, 135.5, 127.5, 127.4, 115.5, 115.3, 87.8, 67.4, 52.3, 36.3.  $^{19}\text{F}$  NMR (376MHz,  $\text{CDCl}_3$ ):  $\delta$  -114.2 (s). HRMS-ESI ( $m/z$ ):  $[\text{M}+\text{H}]^+$  calculated for  $\text{C}_{10}\text{H}_{11}\text{BrFO}$  244.9977, found 244.9980.

### 3-bromo-2-(4-nitrophenyl)tetrahydrofuran (2l)

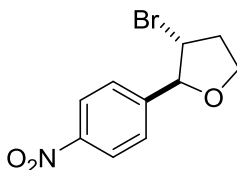

$^1\text{H}$ NMR ( $\text{CDCl}_3$ , 400 MHz):  $\delta$  8.23 (d,  $J = 8.0$  Hz, 2H), 7.60 (d,  $J = 8.3$  Hz, 2H), 5.16 (d,  $J = 5.0$  Hz, 1H), 4.30-4.19 (m, 2H), 4.08 (dd,  $J = 11.0, 5.7$  Hz, 1H), 2.62-2.53 (m, 1H), 2.41-2.33 (m, 1H).  $^{13}\text{C}$  NMR ( $\text{CDCl}_3$ , 100 MHz):  $\delta$  147.8, 147.0, 126.5, 123.8, 87.3, 67.8, 51.3, 36.4. HRMS-ESI ( $m/z$ ):  $[\text{M}+\text{H}]^+$  calculated for  $\text{C}_{10}\text{H}_{11}\text{BrNO}_3$  271.9922, found 271.9922.

### 3-bromo-2-(2,4-dimethoxyphenyl)tetrahydrofuran (2m)

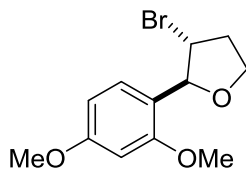

93%,  $^1\text{H NMR}$  ( $\text{CDCl}_3$ , 400 MHz):  $\delta$  7.20 (d,  $J = 7.9$  Hz, 1H), 6.50-6.41 (m, 2H), 5.42 (d,  $J = 1.9$  Hz, 1H), 4.46-4.38 (m, 1H), 4.34-4.20 (m, 2H), 3.84 (s, 3H), 3.80 (s, 3H), 2.38 (d,  $J = 9.9$  Hz, 1H), 2.23 (d,  $J = 5.8$  Hz, 1H);  $^{13}\text{C NMR}$  ( $\text{CDCl}_3$ , 100 MHz):  $\delta$  160.7, 157.3, 127.0, 121.7, 103.9, 98.4, 85.1, 67.5, 55.4, 55.4, 53.2, 35.3. HRMS-ESI ( $m/z$ ):  $[\text{M}+\text{H}]^+$  calculated for  $\text{C}_{12}\text{H}_{16}\text{BrO}_3$  287.0283, found 287.0280.

### 3-bromo-2-(2,5-dimethoxyphenyl)tetrahydrofuran (2n)

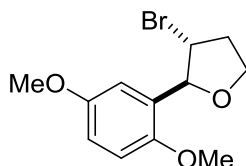

$^1\text{H NMR}$  ( $\text{CDCl}_3$ , 400 MHz):  $\delta$  6.91 (m, 1H), 6.78 (d,  $J = 2.3$  Hz, 2H), 5.48 (s, 1H), 4.44 (d,  $J = 5.4$  Hz, 1H), 4.31 (m, 2H), 3.83 (s, 3H), 3.77 (s, 3H), 2.41-2.28 (m, 1H), 2.26-2.17 (m, 1H);  $^{13}\text{C NMR}$  ( $\text{CDCl}_3$ , 100 MHz):  $\delta$  153.7, 150.4, 130.7, 112.9, 112.7, 111.1, 85.4, 67.8, 55.9, 55.8, 53.3, 35.2. HRMS-ESI ( $m/z$ ):  $[\text{M}+\text{H}]^+$  calculated for  $\text{C}_{12}\text{H}_{16}\text{BrO}_3$  287.0283, found 287.0280.

### 3-bromo-2-(5-chloro-2-methoxyphenyl)tetrahydrofuran (2o)

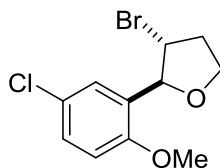

$^1\text{H NMR}$  ( $\text{CDCl}_3$ , 400 MHz):  $\delta$  7.28 (d,  $J = 2.4$  Hz, 1H), 7.21 (dd,  $J = 8.7, 2.6$  Hz, 1H), 6.78 (d,  $J = 8.7$  Hz, 1H), 5.46 (s, 1H), 4.39 (d,  $J = 5.4$  Hz, 1H), 4.35 (td,  $J = 8.2, 1.9$  Hz, 1H), 4.32-4.24 (m, 1H), 3.86 (s, 3H), 2.31 (ddd,  $J = 10.3, 8.3, 5.4$  Hz, 1H), 2.22 (dd,  $J = 13.9, 5.6$  Hz, 1H);  $^{13}\text{C NMR}$  ( $\text{CDCl}_3$ , 100 MHz):  $\delta$  154.8, 131.4, 128.5, 126.2, 125.8, 111.4, 84.7, 67.9, 55.7, 52.8, 35.3. HRMS-ESI ( $m/z$ ):  $[\text{M}+\text{H}]^+$  calculated for  $\text{C}_{11}\text{H}_{13}\text{BrClO}_2$  290.9787, found 290.9785.

**3-bromo-2-(2-methoxynaphthalen-1-yl)tetrahydrofuran (2p)**

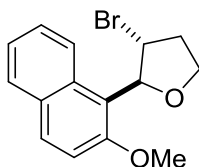

$^1\text{H}$ NMR ( $\text{CDCl}_3$ , 400 MHz):  $\delta$  8.15 (d,  $J = 8.7$  Hz, 1H), 7.81 (dd,  $J = 18.3, 8.7$  Hz, 2H), 7.53-7.41 (m, 1H), 7.39-7.22 (m, 2H), 6.01 (d,  $J = 6.9$  Hz, 1H), 4.84-4.73 (m, 1H), 4.39-4.27 (m, 1H), 4.21-4.09 (m, 1H), 3.96 (s, 3H), 2.99-2.81 (m, 1H), 2.57-2.44 (m, 1H);  $^{13}\text{C}$  NMR ( $\text{CDCl}_3$ , 100 MHz):  $\delta$  156.3, 132.7, 130.8, 129.6, 128.8, 126.7, 123.5, 123.3, 118.1, 114.0, 83.0, 67.3, 57.0, 50.4, 38.2. HRMS-ESI ( $m/z$ ):  $[\text{M}+\text{H}]^+$  calculated for  $\text{C}_{15}\text{H}_{16}\text{BrO}_2$  307.0334, found 307.0330.

**(4-(3-bromo-2-methyltetrahydrofuran-2-yl)phenoxy)(*tert*-butyl)diphenylsilane**

**(2q)**

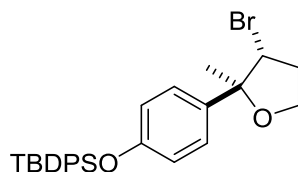

$^1\text{H}$ NMR ( $\text{CDCl}_3$ , 400 MHz):  $\delta$  7.77-7.66 (m, 4H), 7.43 (dd,  $J = 8.4, 6.2$  Hz, 2H), 7.36 (dd,  $J = 11.0, 4.1$  Hz, 4H), 7.14-7.06 (m, 2H), 6.75-6.68 (m, 2H), 4.50 (dd,  $J = 5.6, 3.2$  Hz, 1H), 4.18 (dd,  $J = 15.8, 8.1$  Hz, 1H), 3.98 (td,  $J = 8.4, 3.7$  Hz, 1H), 2.37-2.30 (m, 1H), 2.26-2.20 (m, 1H), 1.6 (s, 3H), 1.1 (s, 9H);  $^{13}\text{C}$  NMR ( $\text{CDCl}_3$ , 100 MHz):  $\delta$  154.7, 137.7, 135.5, 132.9, 129.9, 127.7, 125.5, 119.5, 86.4, 65.5, 58.7, 36.4, 28.0, 26.5, 19.4. HRMS-ESI ( $m/z$ ):  $[\text{M}+\text{H}]^+$  calculated for  $\text{C}_{27}\text{H}_{32}\text{BrO}_2\text{Si}$  495.1355, found 495.1358.

**3-bromo-2,2-bis(4-methoxyphenyl)tetrahydrofuran (2r)**

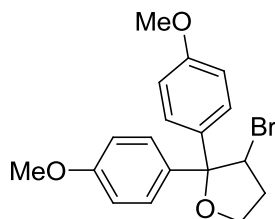

$^1\text{H}$ NMR ( $\text{CDCl}_3$ , 400 MHz):  $\delta$  7.38 (dd,  $J = 20.5, 8.8$  Hz, 4H), 6.82 (dd,  $J = 14.0, 8.8$  Hz, 4H), 5.20 (dd,  $J = 4.5, 2.6$  Hz, 1H), 4.39 (q,  $J = 8.0$  Hz, 1H), 4.05 (td,  $J = 8.2, 4.4$



Hz, 1H), 3.75 (d,  $J = 5.2$  Hz, 6H), 2.45 (dd,  $J = 7.8, 4.6$  Hz, 2H);  $^{13}\text{C}$  NMR ( $\text{CDCl}_3$ , 100 MHz):  $\delta$  158.7, 158.3, 136.9, 136.3, 127.3, 126.4, 114.0, 113.0, 90.5, 65.2, 57.3, 55.3, 55.1, 36.58. HRMS-ESI ( $m/z$ ):  $[\text{M}+\text{H}]^+$  calculated for  $\text{C}_{18}\text{H}_{20}\text{BrO}_3$  363.0596, found 363.0598.

**3-bromo-2-(4-methoxyphenyl)-4,4-dimethyltetrahydrofuran (2s)**

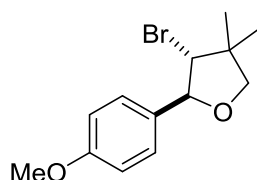

$^1\text{H}$ NMR ( $\text{CDCl}_3$ , 400 MHz):  $\delta$  7.35 (d,  $J = 8.6$  Hz, 2H), 6.9 (d,  $J = 8.7$  Hz, 1H), 4.92 (d,  $J = 9.1$  Hz, 1H), 3.92-3.85 (m, 2H), 3.81 (s, 3H), 3.77 (d,  $J = 9.1$  Hz, 1H), 1.26 (s, 3H), 1.14 (s, 3H);  $^{13}\text{C}$  NMR ( $\text{CDCl}_3$ , 100 MHz):  $\delta$  159.6, 131.8, 127.4, 113.8, 85.6, 78.7, 65.3, 55.2, 42.7, 23.9, 23.7. HRMS-ESI ( $m/z$ ):  $[\text{M}+\text{H}]^+$  calculated for  $\text{C}_{13}\text{H}_{18}\text{BrO}_2$  285.0490, found 285.0492.

**3-bromo-2-(4-methoxyphenyl)tetrahydro-2H-pyran (2t)**

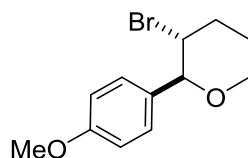

$^1\text{H}$ NMR ( $\text{CDCl}_3$ , 400 MHz):  $\delta$  7.31 (d,  $J = 8.7$  Hz, 2H), 6.89 (d,  $J = 8.7$  Hz, 2H), 4.28 (d,  $J = 10$  Hz, 1H), 4.14-4.01 (m, 2H), 3.80 (s, 3H), 3.63 (td,  $J = 12.0, 2.2$  Hz, 1H), 2.61-2.56 (m, 1H), 2.17-2.06 (m, 1H), 1.99-1.87 (m, 1H), 1.75-1.71 (m, 1H);  $^{13}\text{C}$  NMR ( $\text{CDCl}_3$ , 100 MHz):  $\delta$  159.6, 132.0, 128.7, 113.6, 85.1, 68.7, 55.2, 52.7, 36.2, 28.4. HRMS-ESI ( $m/z$ ):  $[\text{M}+\text{H}]^+$  calculated for  $\text{C}_{12}\text{H}_{16}\text{BrO}_2$  271.0334, found 271.0330.

**3-bromo-2-p-tolyltetrahydro-2H-pyran (2u)**

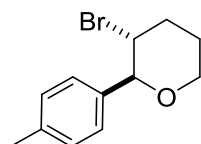

$^1\text{H}$ NMR ( $\text{CDCl}_3$ , 400 MHz):  $\delta$  7.27 (d,  $J = 8.4$  Hz, 2H), 7.17 (d,  $J = 7.9$  Hz, 2H), 4.29 (d,  $J = 10.0$  Hz, 1H), 4.14-4.03 (m, 2H), 3.63 (td,  $J = 12.0, 2.2$  Hz, 1H), 2.61-2.55 (m, 1H), 2.35 (s, 3H), 2.12 (ddd,  $J = 24.8, 13.0, 4.2$  Hz, 1H), 2.06-1.84 (m, 1H), 1.74 (dd,

$J = 13.7, 2.3$  Hz, 1H);  $^{13}\text{C}$  NMR ( $\text{CDCl}_3$ , 100 MHz):  $\delta$  138.2, 136.7, 129.0, 127.4, 85.4, 68.7, 52.5, 36.2, 28.4, 21.3. Data are consistent with literature values.<sup>[9]</sup>

**3-bromo-2-(4-methoxyphenyl)-6-methyltetrahydro-2H-pyran (2v)**

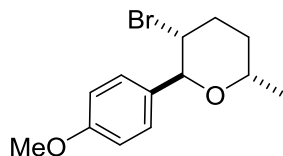

$^1\text{H}$ NMR ( $\text{CDCl}_3$ , 400 MHz):  $\delta$  7.30 (d,  $J = 8.7$  Hz, 2H), 6.89 (d,  $J = 8.7$  Hz, 2H), 4.73 (d,  $J = 8.4$  Hz, 1H), 4.23 (ddd,  $J = 14.3, 9.5, 5.1$  Hz, 2H), 3.80 (s, 3H), 2.31 (d,  $J = 5.2$  Hz, 2H), 2.04-1.91 (m, 1H), 1.75-1.64 (m, 1H), 1.37 (d,  $J = 6.7$  Hz, 3H);  $^{13}\text{C}$  NMR ( $\text{CDCl}_3$ , 100 MHz):  $\delta$  159.4, 132.0, 128.5, 113.8, 68.8, 55.3, 53.0, 30.9, 30.3, 17.4. HRMS-ESI ( $m/z$ ):  $[\text{M}+\text{H}]^+$  calculated for  $\text{C}_{13}\text{H}_{18}\text{BrO}_2$  285.0490, found 285.0492.

**2-(bromo(4-methoxyphenyl)methyl)-5-methyltetrahydrofuran (3v)**

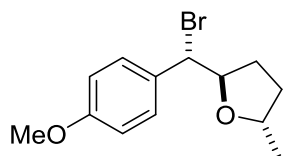

$^1\text{H}$ NMR ( $\text{CDCl}_3$ , 400 MHz):  $\delta$  7.31 (d,  $J = 8.1$  Hz, 2H), 6.88 (d,  $J = 8.1$  Hz, 2H), 4.34 (d,  $J = 10.0$  Hz, 1H), 4.07-3.91 (m, 1H), 3.80 (s, 3H), 3.72 (dd,  $J = 10.6, 5.7$  Hz, 1H), 2.54 (d,  $J = 13.4$  Hz, 1H), 2.15 (qd,  $J = 13.0, 3.6$  Hz, 1H), 1.77 (d,  $J = 13.3$  Hz, 1H), 1.58 (d,  $J = 12.0$  Hz, 1H), 1.21 (d,  $J = 6.0$  Hz, 3H);  $^{13}\text{C}$  NMR ( $\text{CDCl}_3$ , 100 MHz):  $\delta$  159.5, 132.2, 128.7, 113.6, 84.7, 74.6, 55.2, 53.0, 36.2, 35.5, 21.6. HRMS-ESI ( $m/z$ ):  $[\text{M}+\text{H}]^+$  calculated for  $\text{C}_{13}\text{H}_{18}\text{BrO}_2$  285.0490, found 285.0492.

**3-bromo-2-(4-methoxyphenyl)-6-phenyltetrahydro-2H-pyran (2w)**

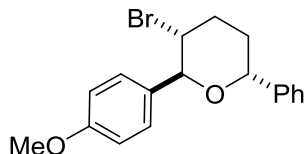

$^1\text{H}$ NMR ( $\text{CDCl}_3$ , 400 MHz):  $\delta$  7.51-7.38 (m, 4H), 7.33 (dd,  $J = 8.4, 5.3$  Hz, 3H), 6.95-6.88 (m, 2H), 5.10 (s, 1H), 4.64 (d,  $J = 8.2$  Hz, 1H), 4.42 (td,  $J = 9.0, 4.1$  Hz, 1H), 3.82 (s, 3H), 2.44 (ddd,  $J = 15.7, 10.1, 5.0$  Hz, 2H), 2.33-2.12 (m, 2H);  $^{13}\text{C}$

<sup>9</sup> S. E. Denmark, M. T. Burk, *Org. Lett.*, 2012, 14, 256-259.

NMR (CDCl<sub>3</sub>, 100 MHz):  $\delta$  159.5, 139.8, 131.6, 128.8, 128.5, 127.4, 126.6, 113.9, 77.8, 73.5, 55.3, 52.3, 30.9, 28.4. HRMS-ESI ( $m/z$ ): [M+H]<sup>+</sup> calculated for C<sub>18</sub>H<sub>20</sub>BrO<sub>2</sub> 347.0647, found 347.0648.

**2-(bromo(4-methoxyphenyl)methyl)-5-phenyltetrahydrofuran (3w)**

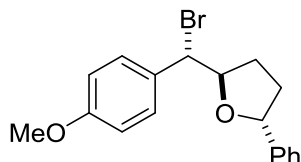

<sup>1</sup>HNMR (CDCl<sub>3</sub>, 400 MHz):  $\delta$  7.32 (ddd,  $J$  = 27.5, 18.9, 7.3 Hz, 8H), 6.89 (d,  $J$  = 8.7 Hz, 2H), 4.65 (dd,  $J$  = 11.2, 2.0 Hz, 1H), 4.53 (d,  $J$  = 10.0 Hz, 1H), 4.14- 4.02 (m, 1H), 3.80 (s, 3H), 2.66 (dd,  $J$  = 13.2, 3.7 Hz, 1H), 2.33 (ddd,  $J$  = 25.3, 13.1, 4.2 Hz, 1H), 2.14-2.00 (m, 1H), 1.90 (ddd,  $J$  = 25.0, 13.6, 3.8 Hz, 1H); <sup>13</sup>C NMR (CDCl<sub>3</sub>, 100 MHz):  $\delta$  <sup>13</sup>C NMR (101 MHz, CDCl<sub>3</sub>)  $\delta$  159.6, 141.8, 132.0, 128.83 (s), 128.3, 127.6, 125.8, 113.5, 85.1, 80.2, 55.2, 52.8, 36.6, 36.1. HRMS-ESI ( $m/z$ ): [M+H]<sup>+</sup> calculated for C<sub>18</sub>H<sub>20</sub>BrO<sub>2</sub> 347.0647, found 347.0648.

**2-(bromomethyl)-5-phenyltetrahydrofuran (3x)**

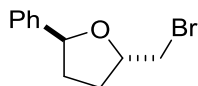

<sup>1</sup>HNMR (CDCl<sub>3</sub>, 400 MHz):  $\delta$  7.40-7.30 (m, 4H), 5.15-5.05 (m, 1H), 4.58-4.44 (m, 1H), 3.55 (dd,  $J$  = 10.1, 4.7 Hz, 1H), 3.46 (dd,  $J$  = 10.1, 6.8 Hz, 1H), 2.41 (dt,  $J$  = 11.3, 5.6 Hz, 1H), 2.31-2.14 (m, 1H), 2.02-1.76 (m, 2H); <sup>13</sup>C NMR (CDCl<sub>3</sub>, 100 MHz):  $\delta$  142.7, 128.4, 127.4, 125.6, 81.54 (s), 78.7, 36.0, 35.2, 31.2. Data are consistent with literature values.<sup>[10]</sup>

<sup>10</sup> M. Greb, J. Hartung, F. Köhler, K. Spehar, R. Kluge, R. Csuk, *Eur. J. Org. Chem.* **2004**, 3799-3812.

## 6. $^1\text{H}$ and $^{13}\text{C}$ NMR spectra

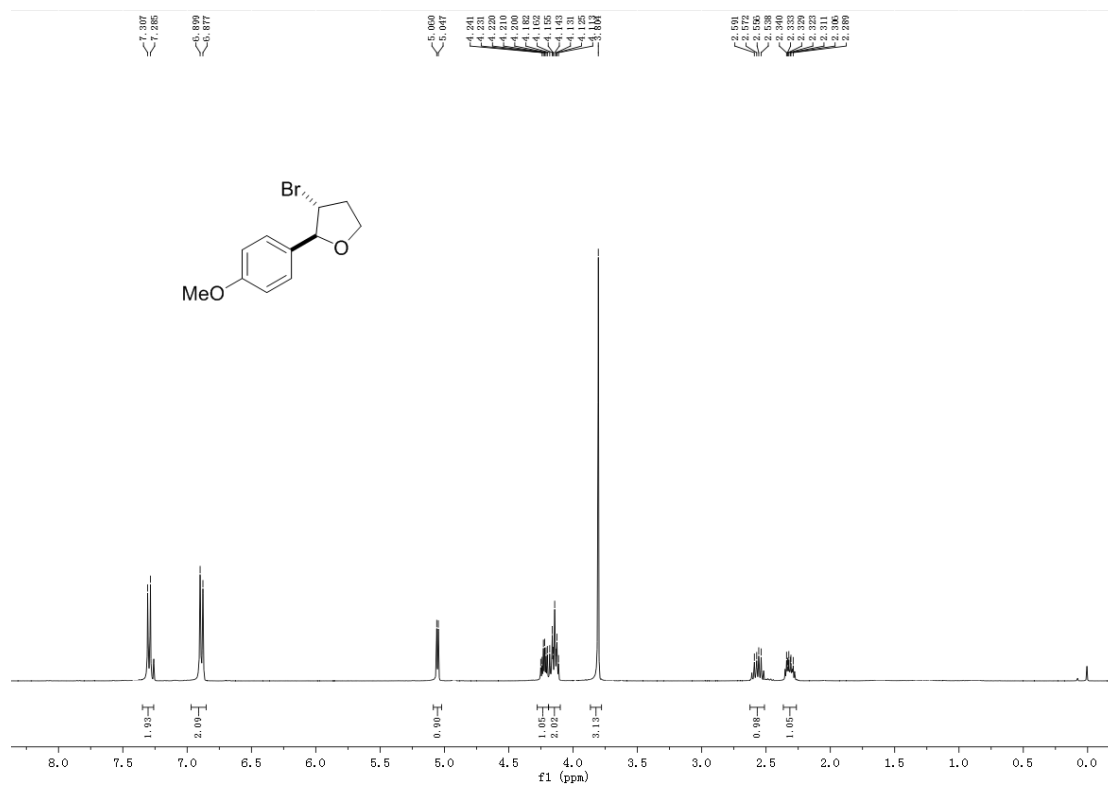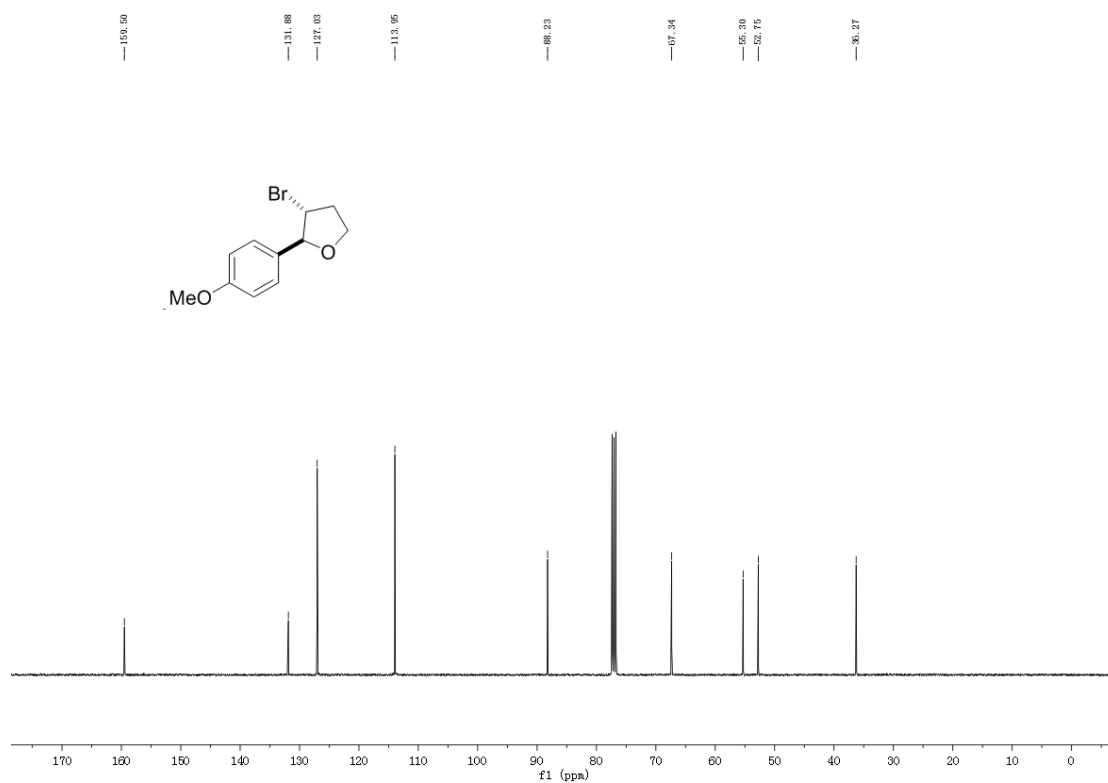

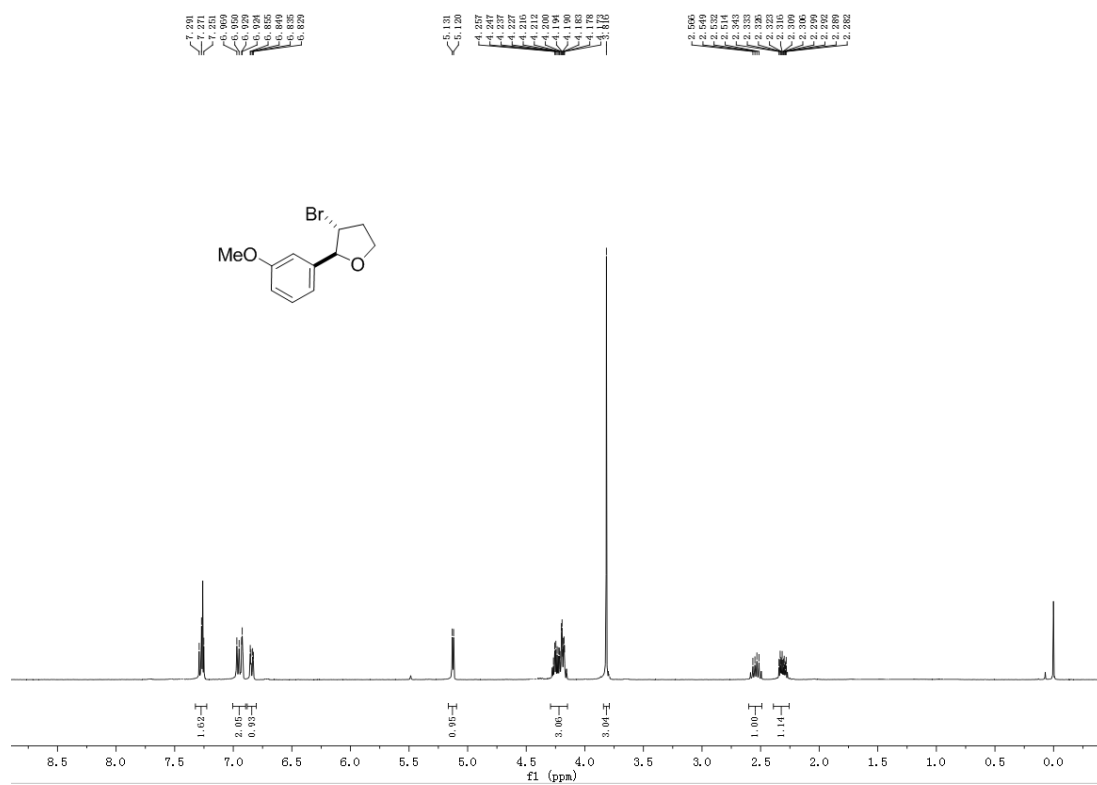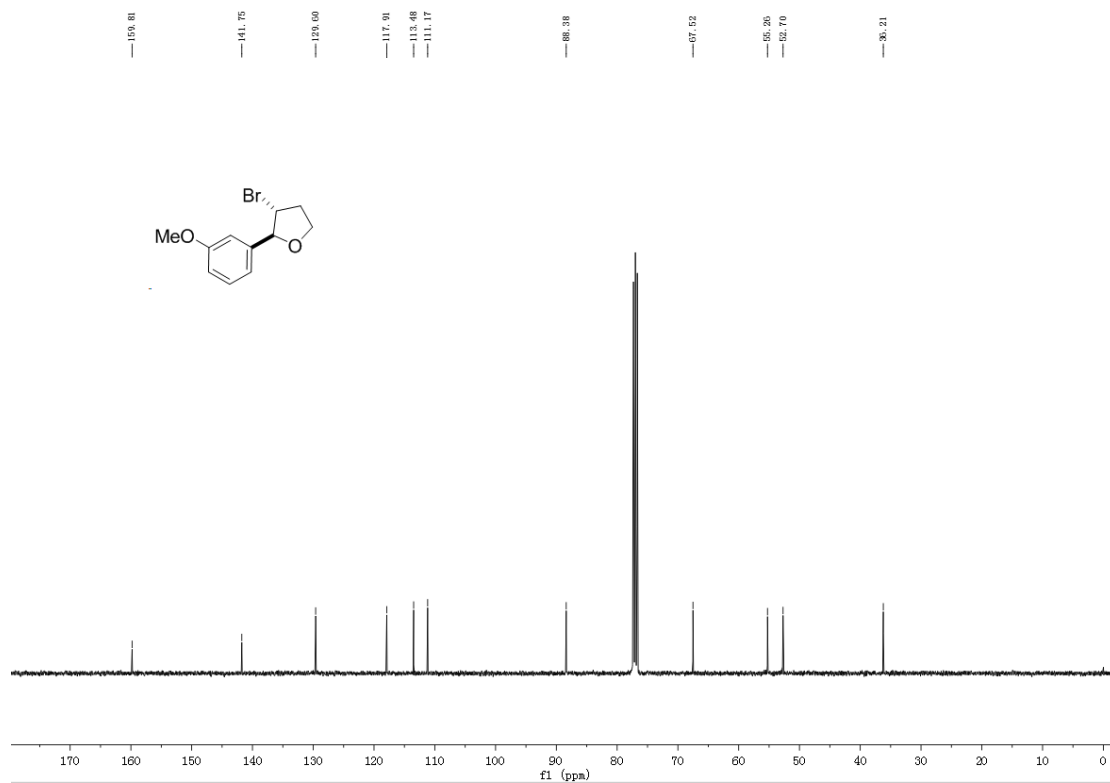

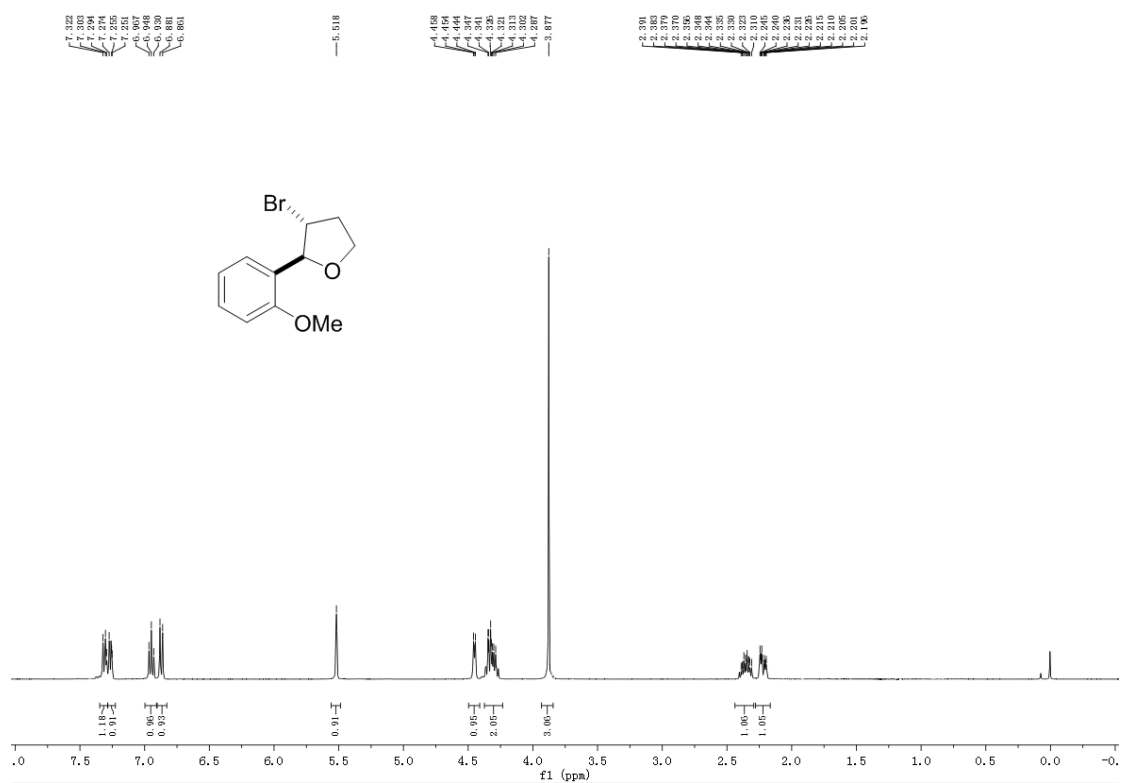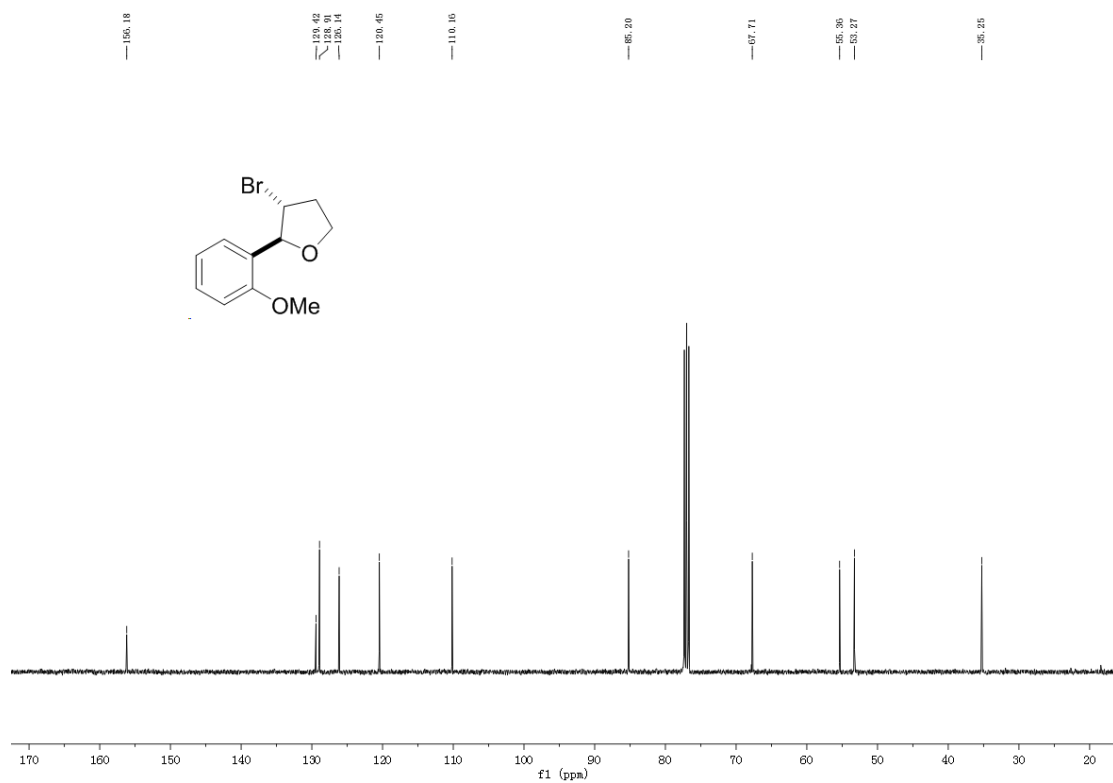

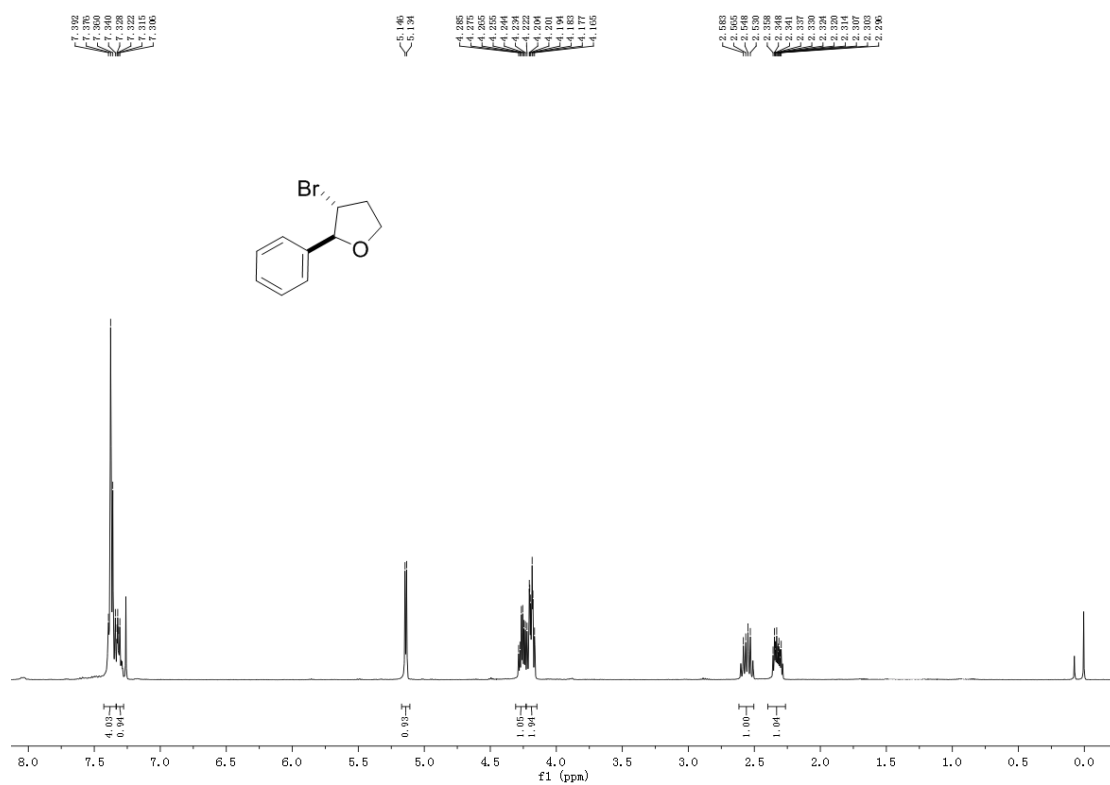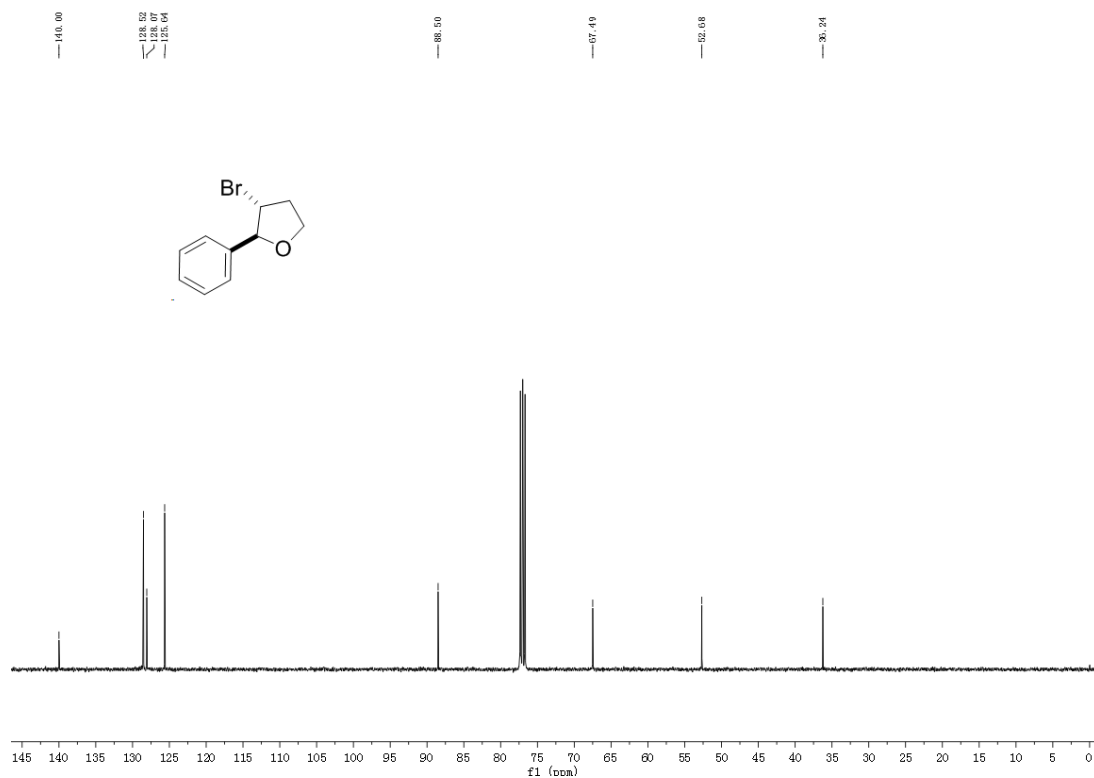

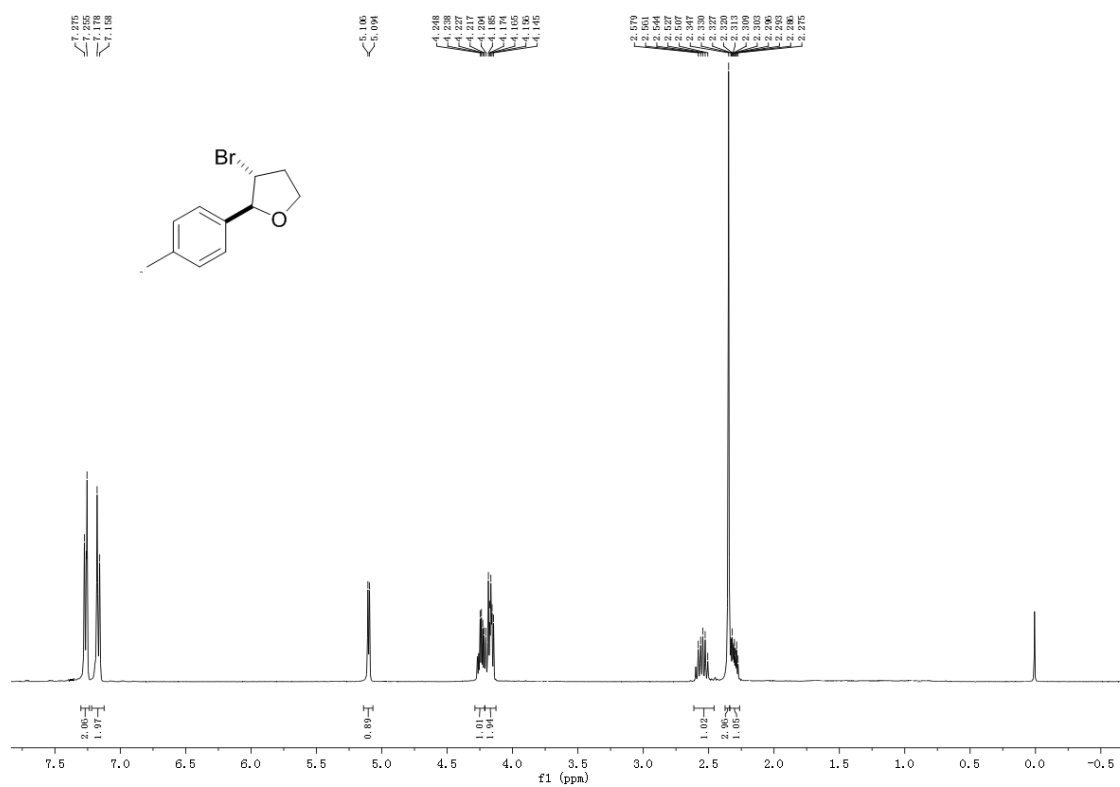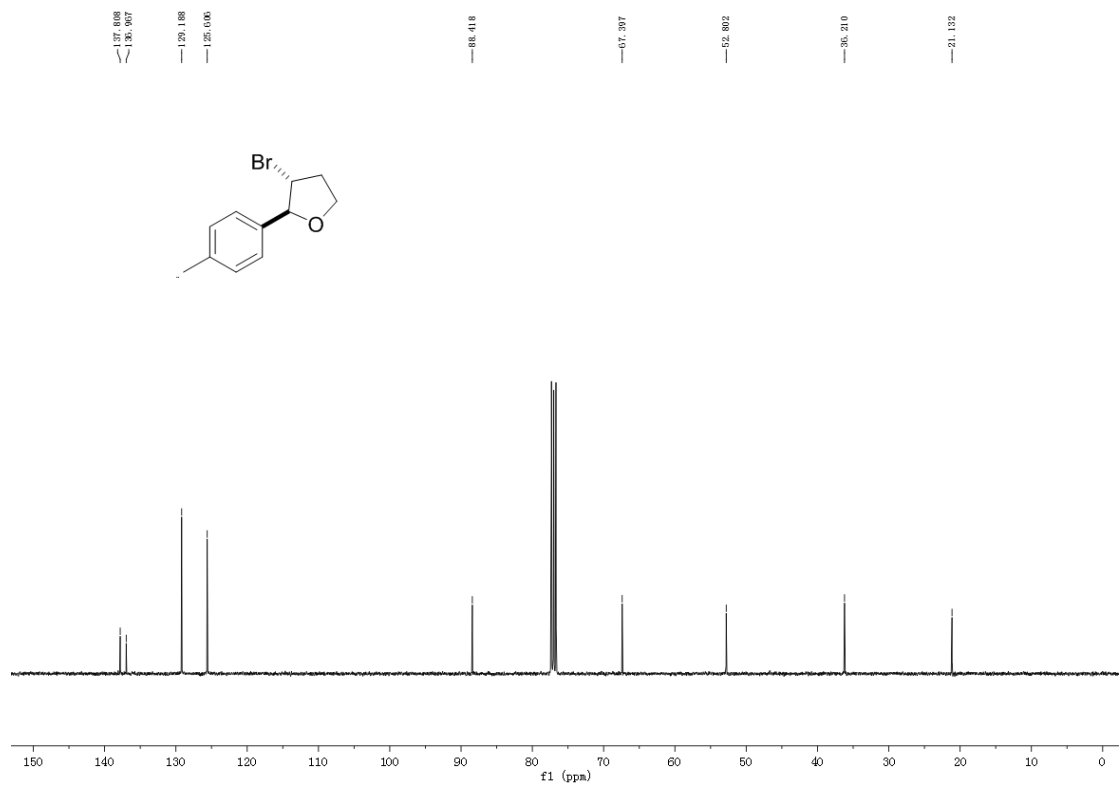



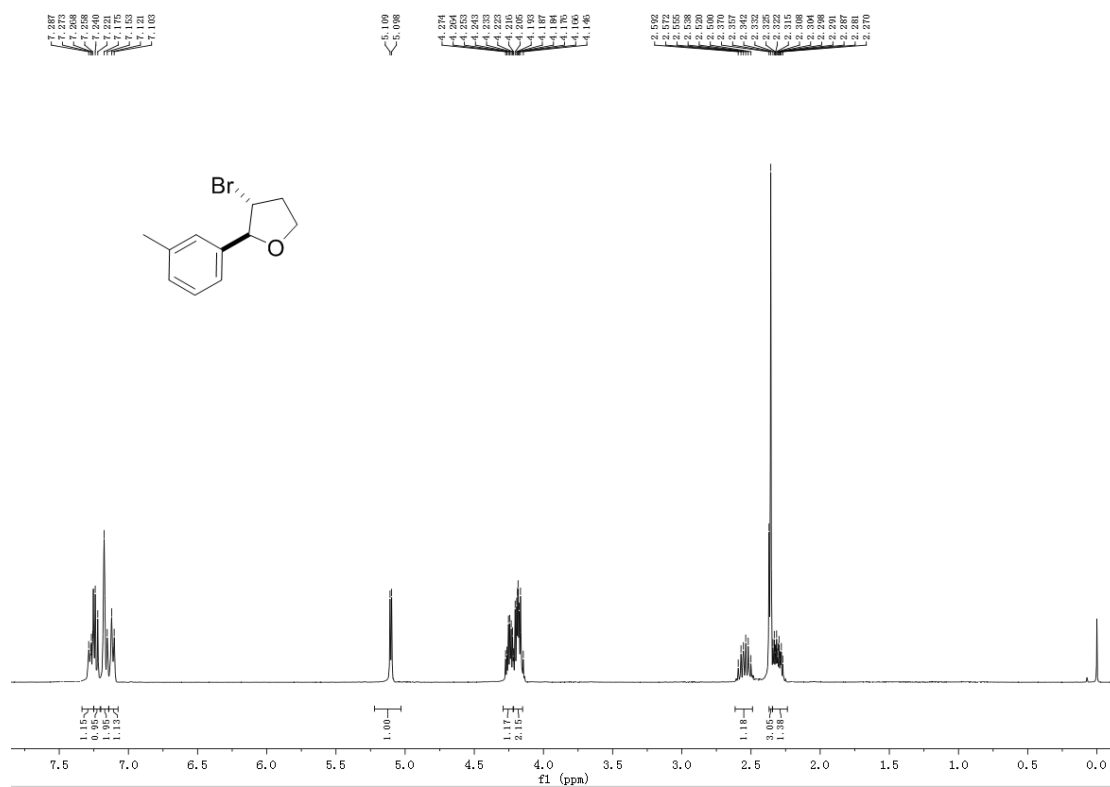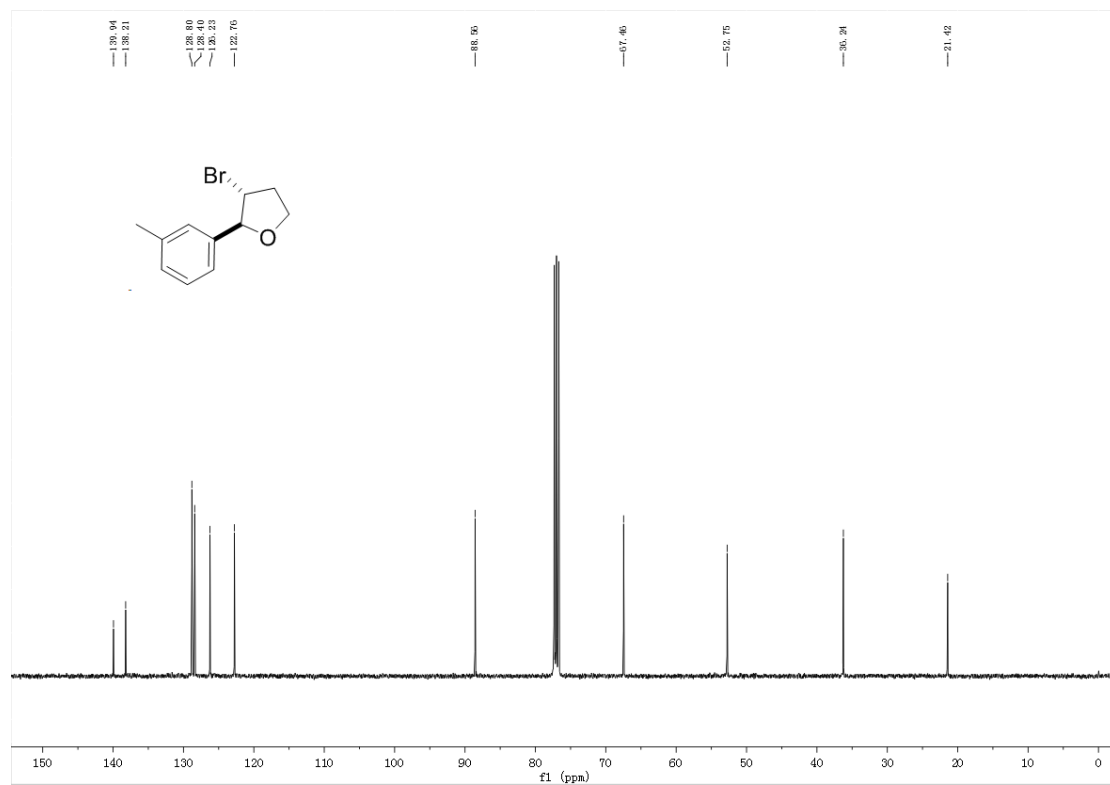



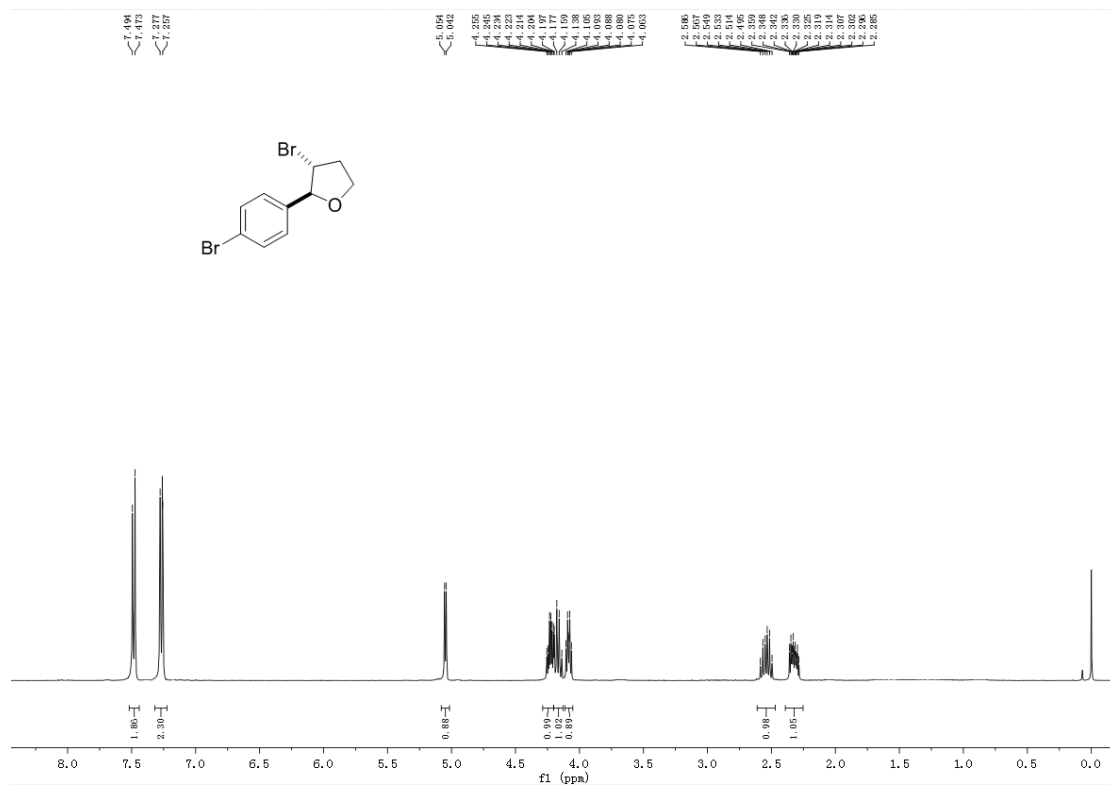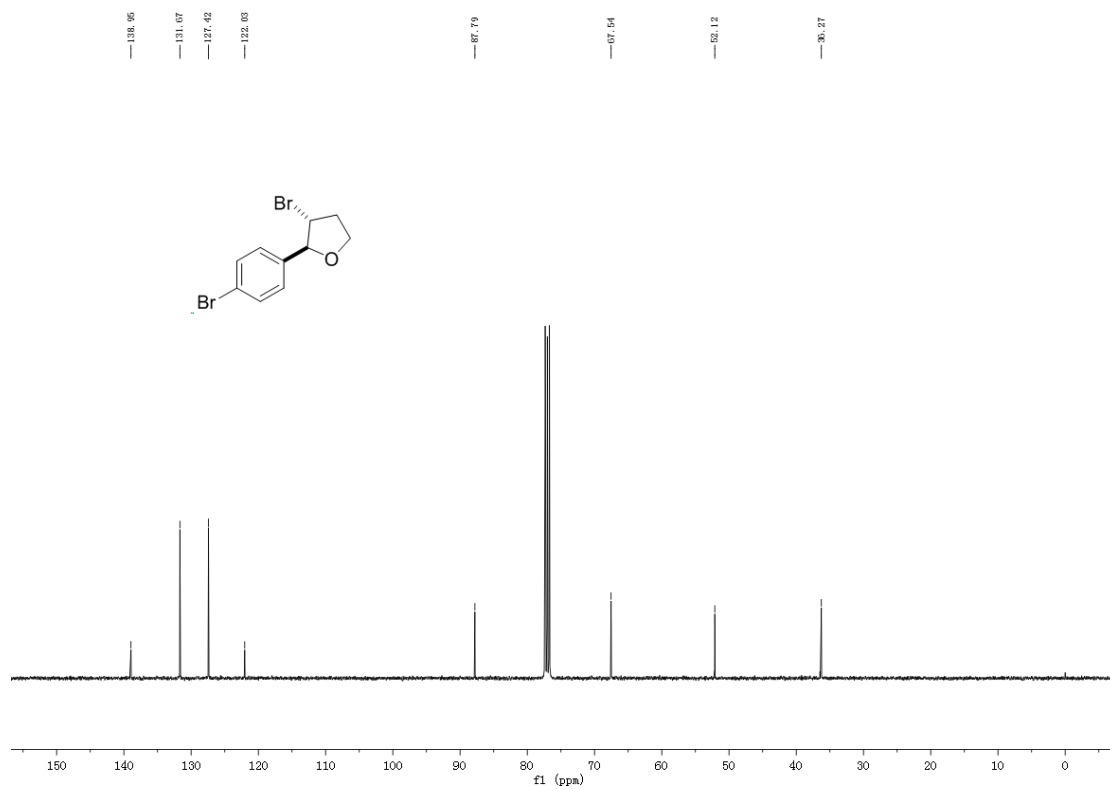

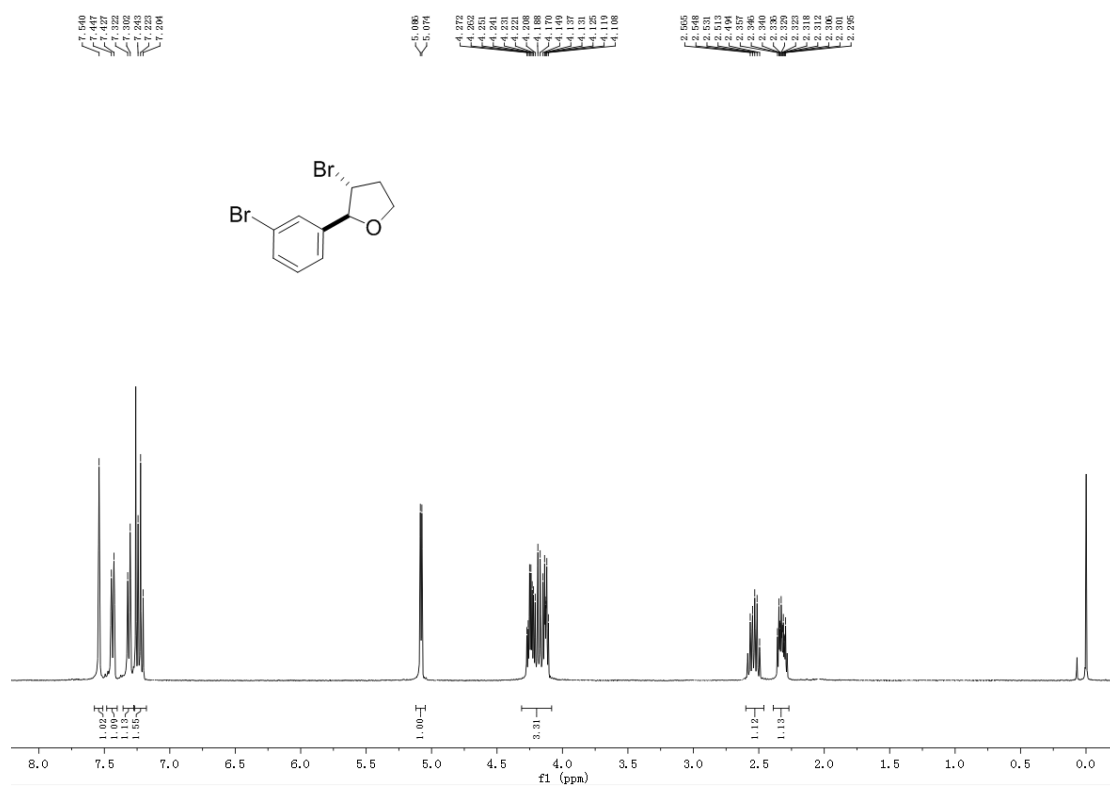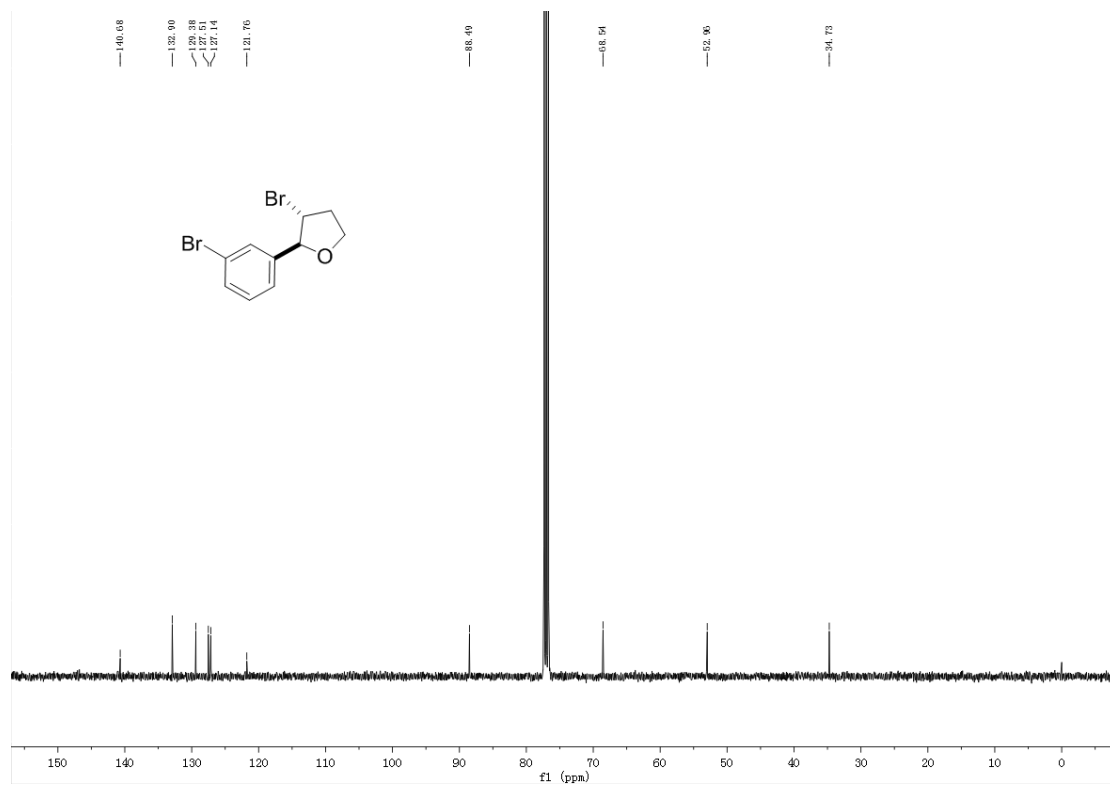

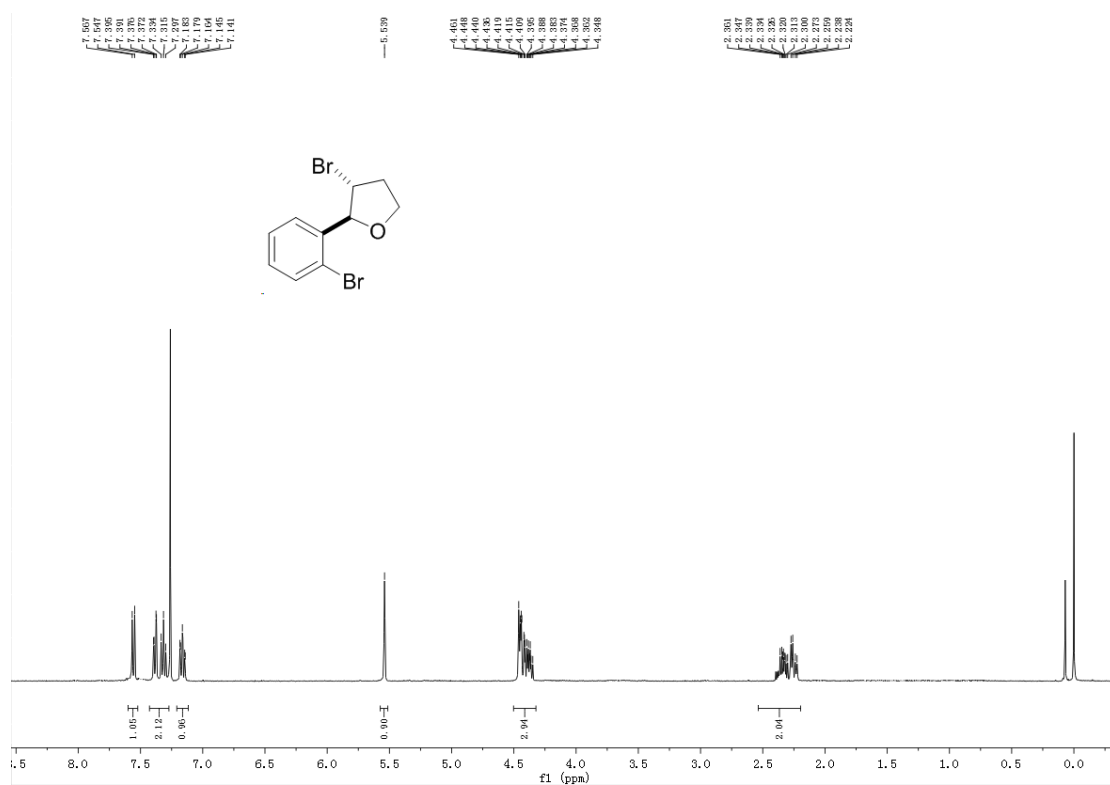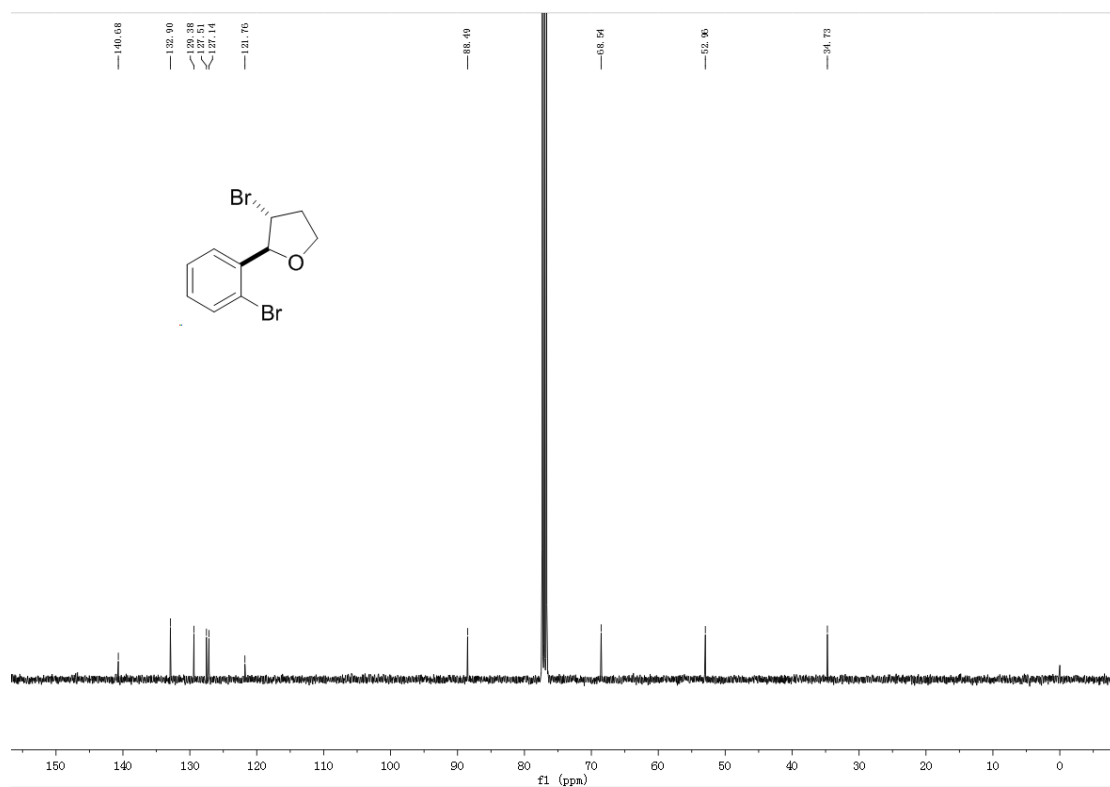

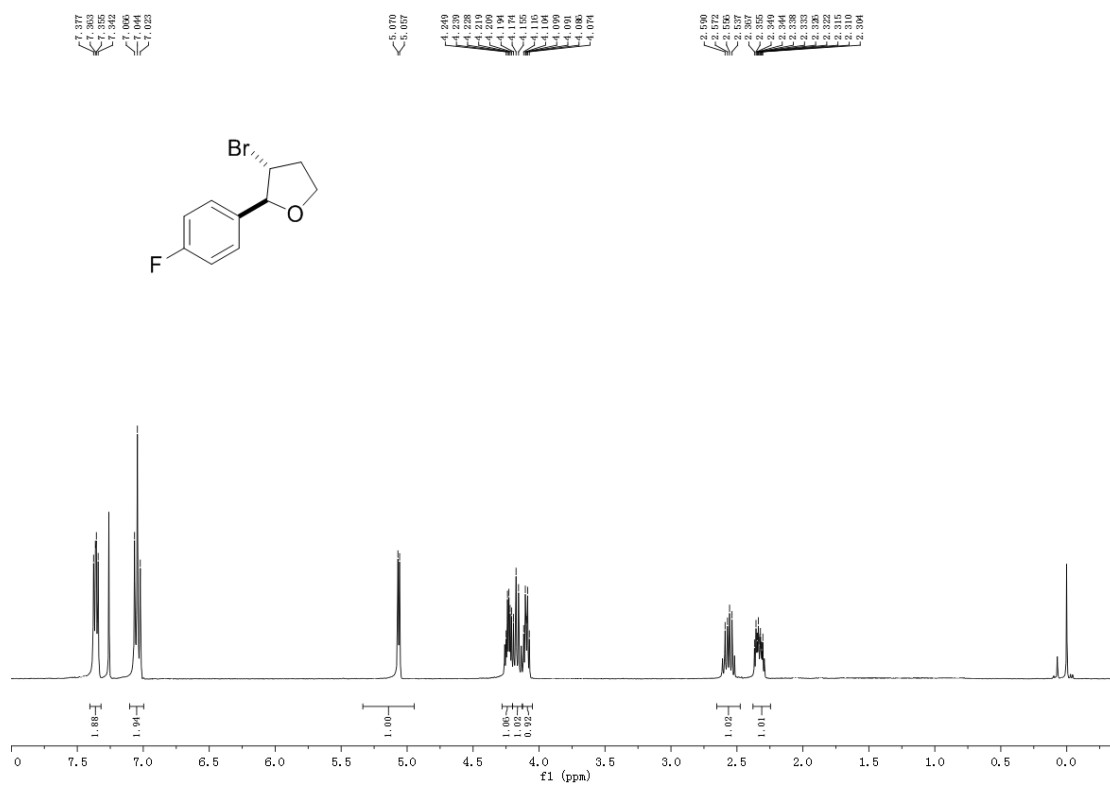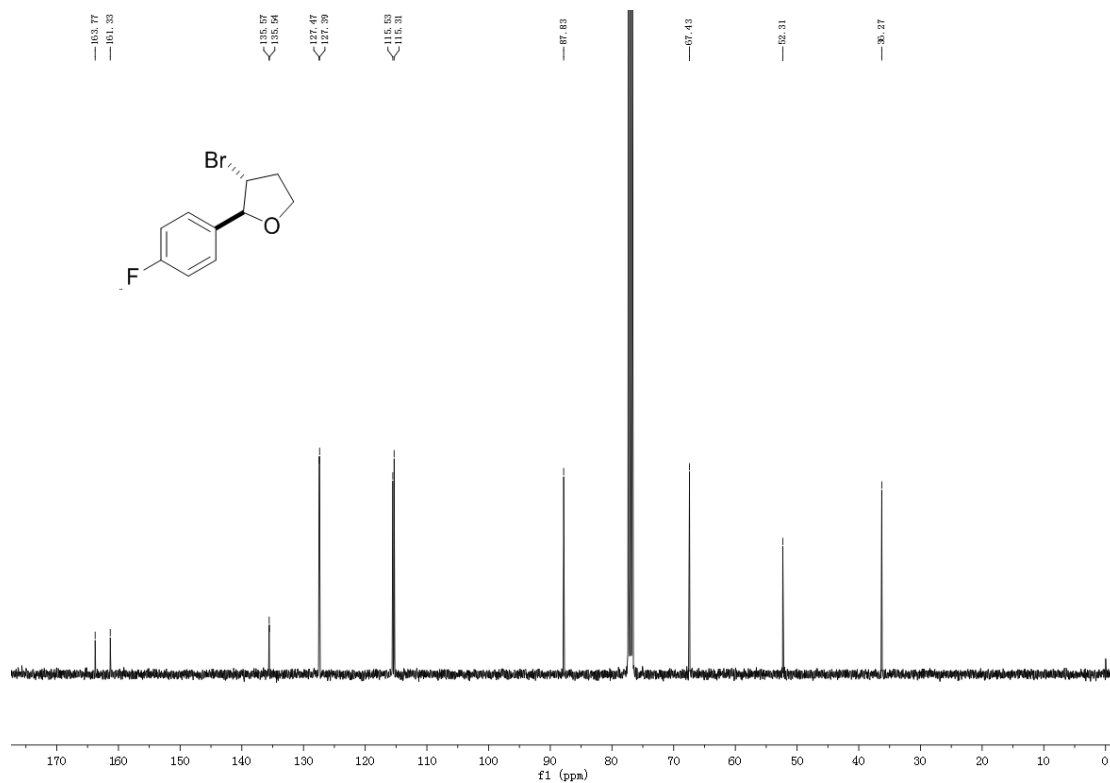

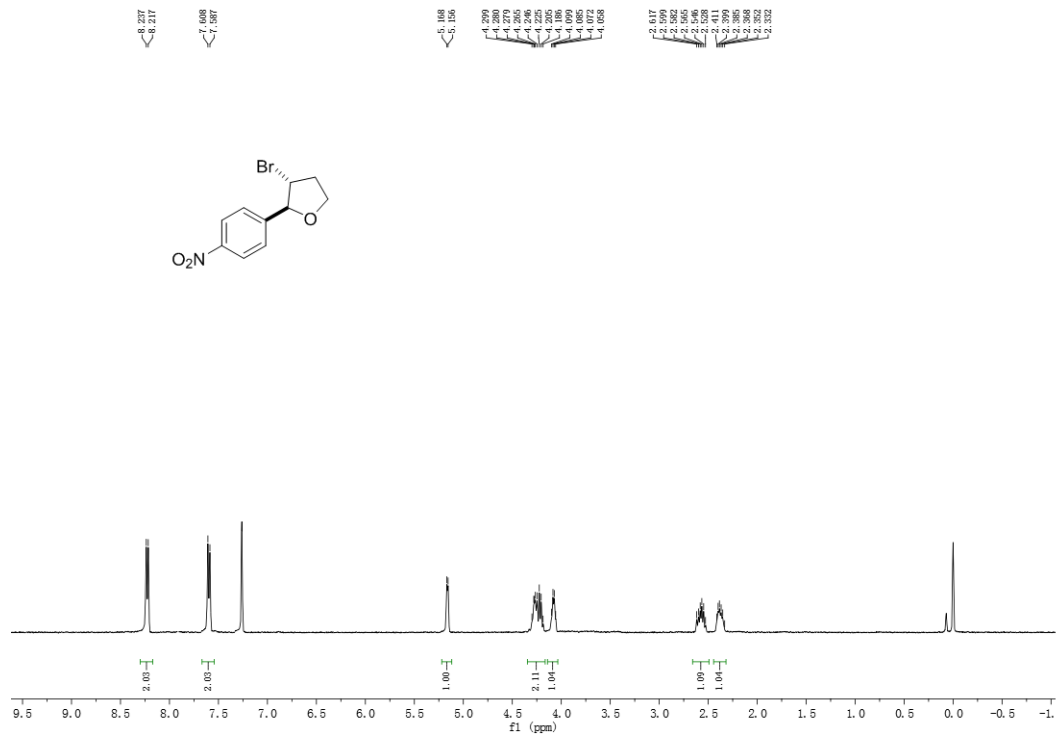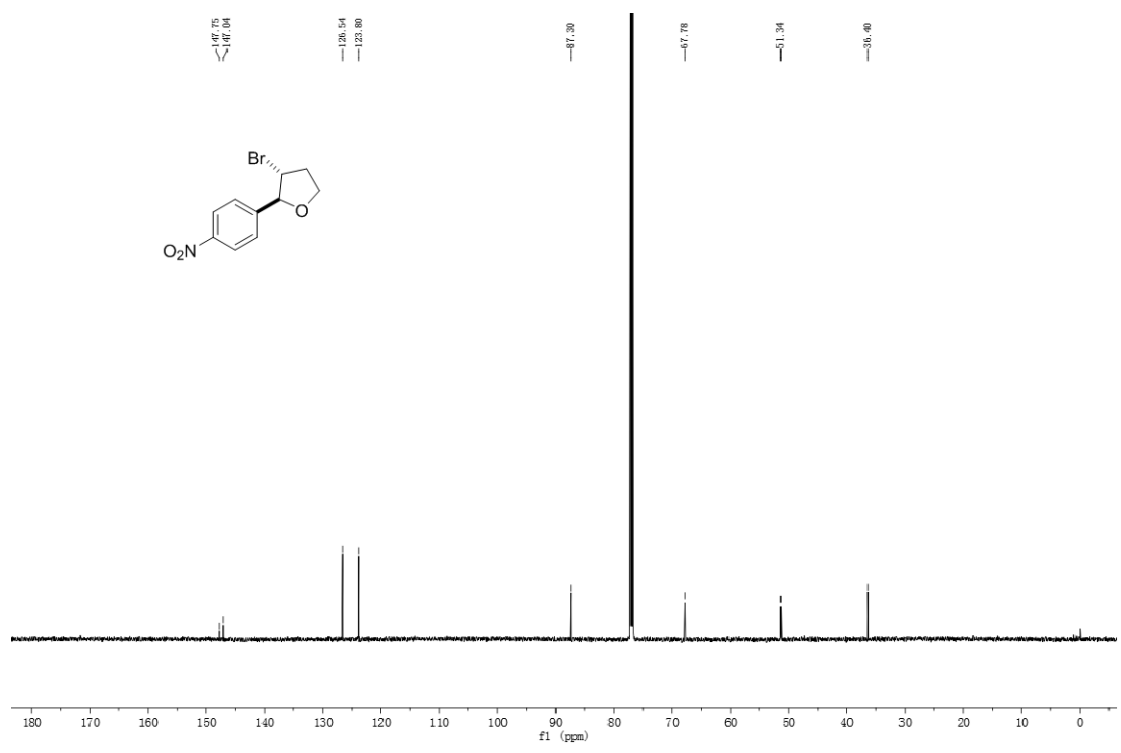

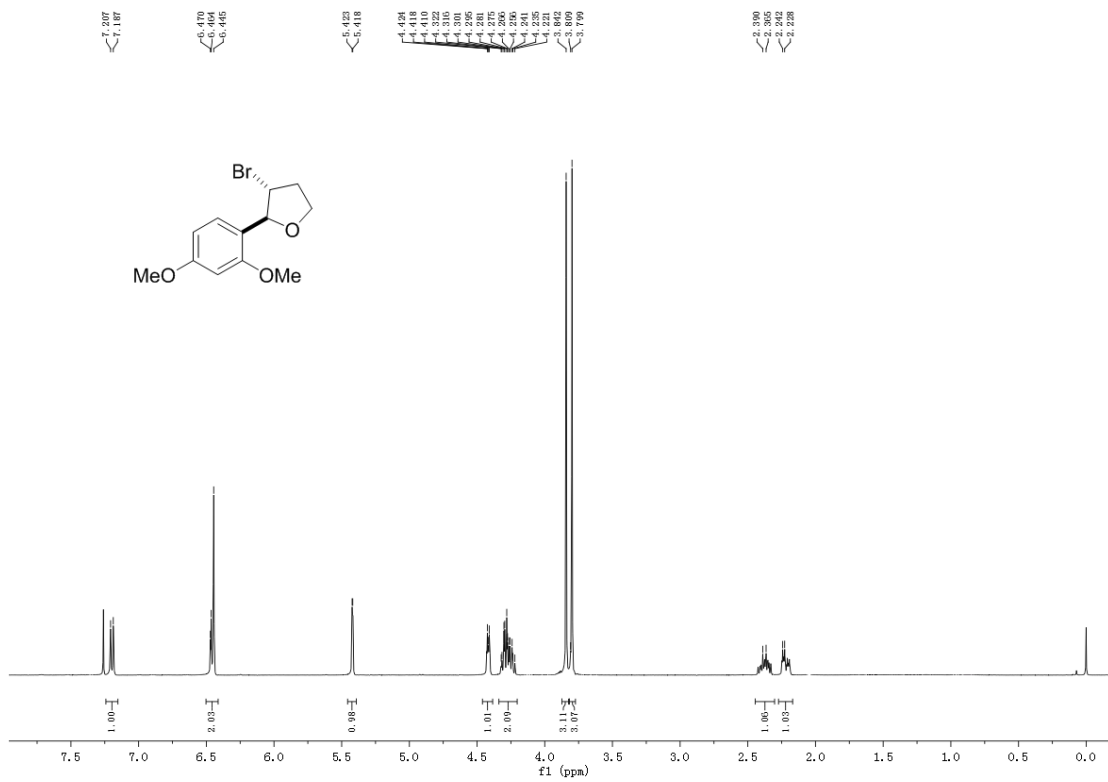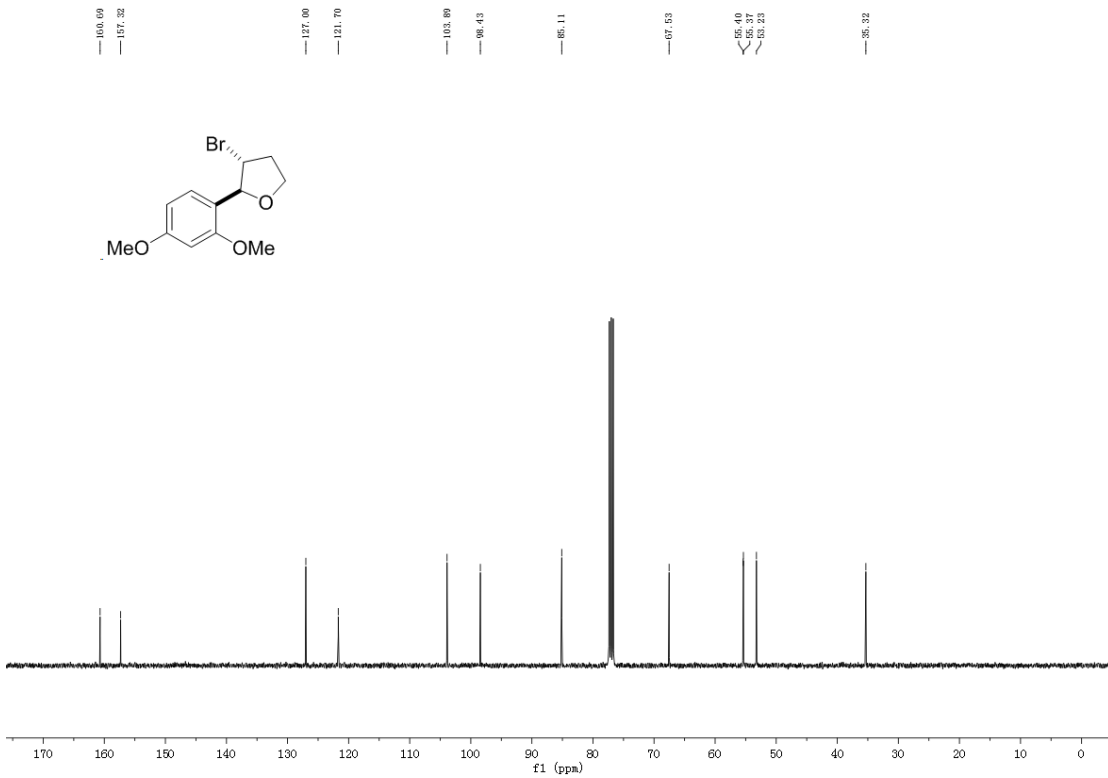



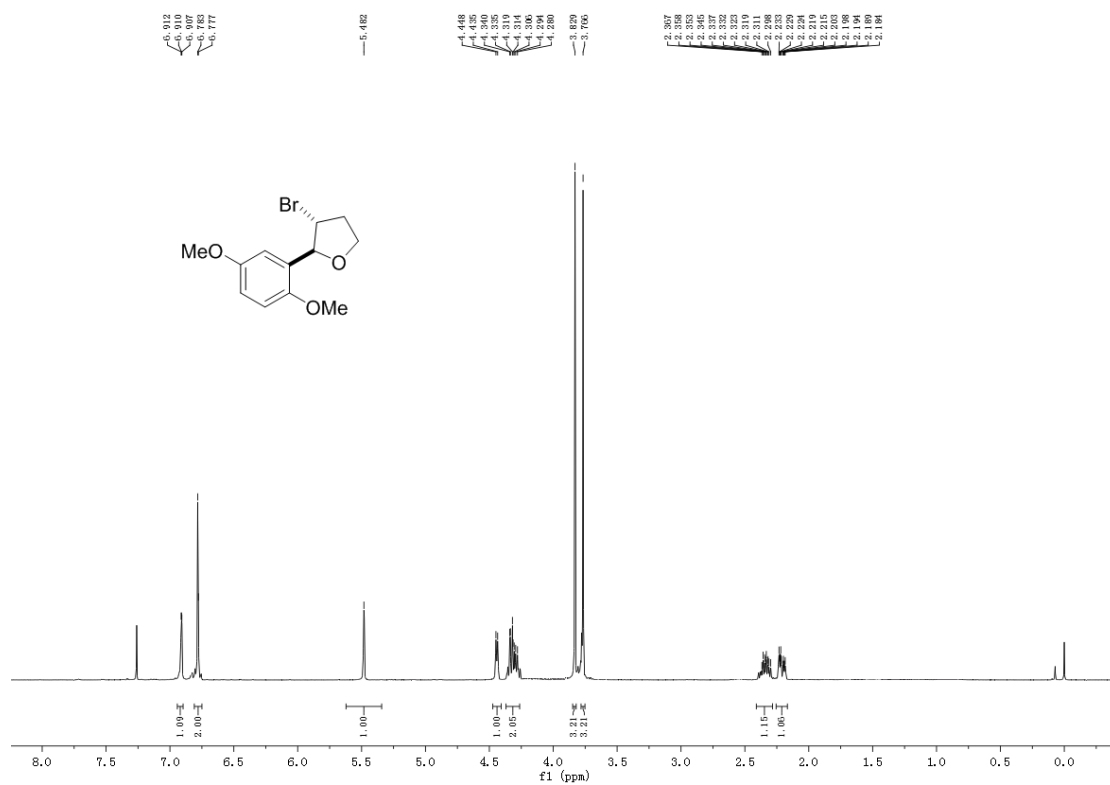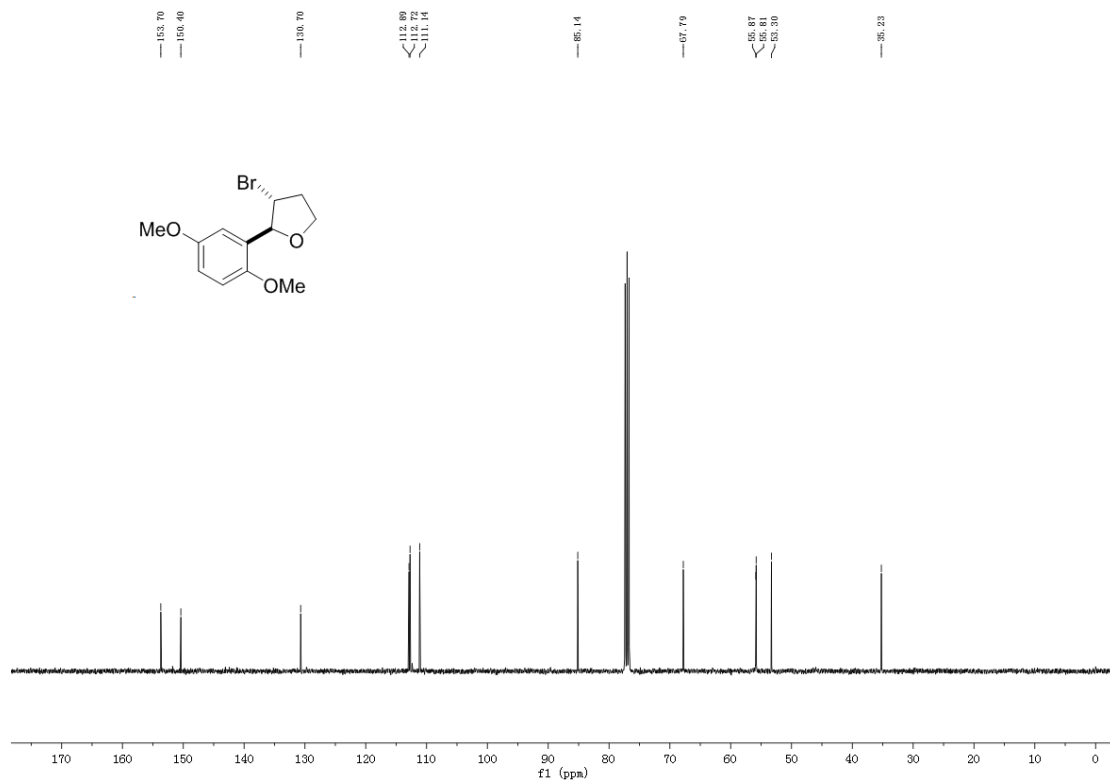

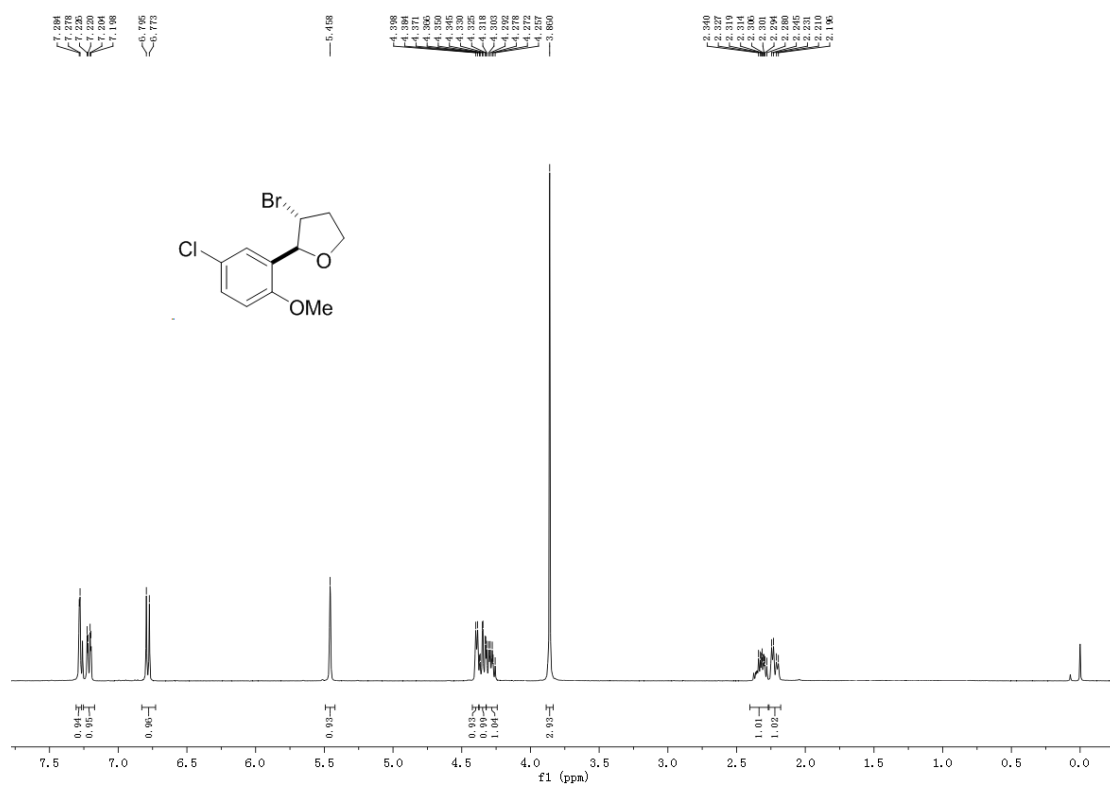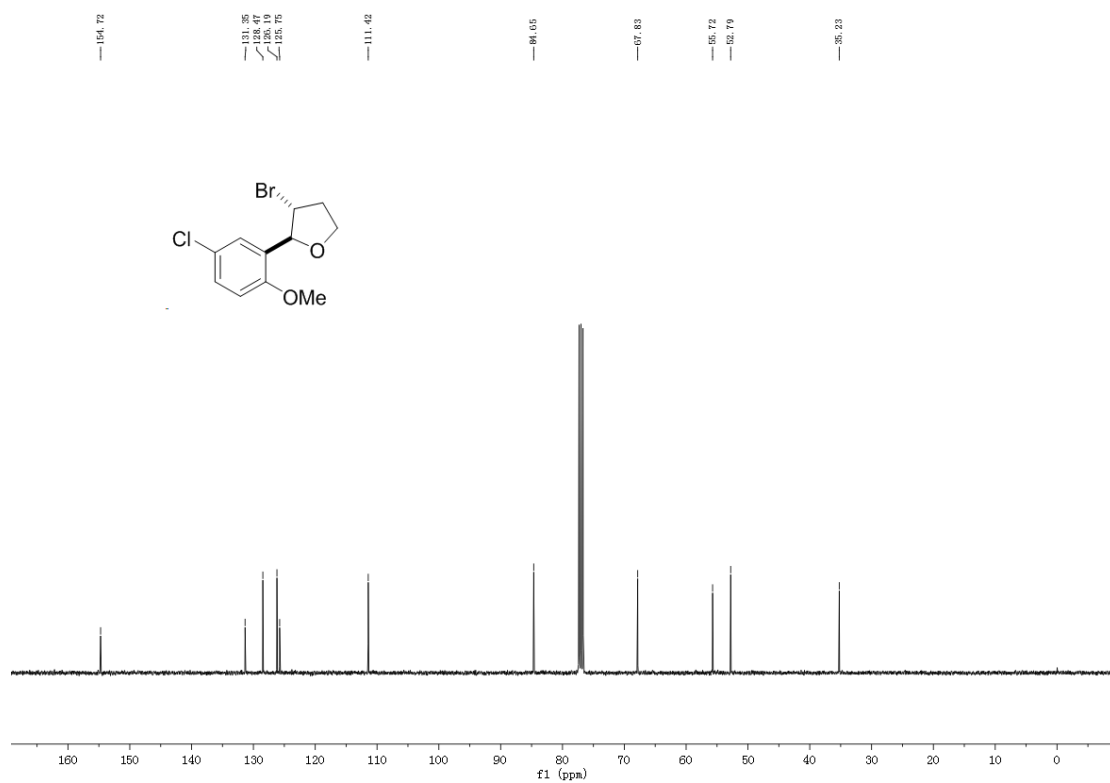

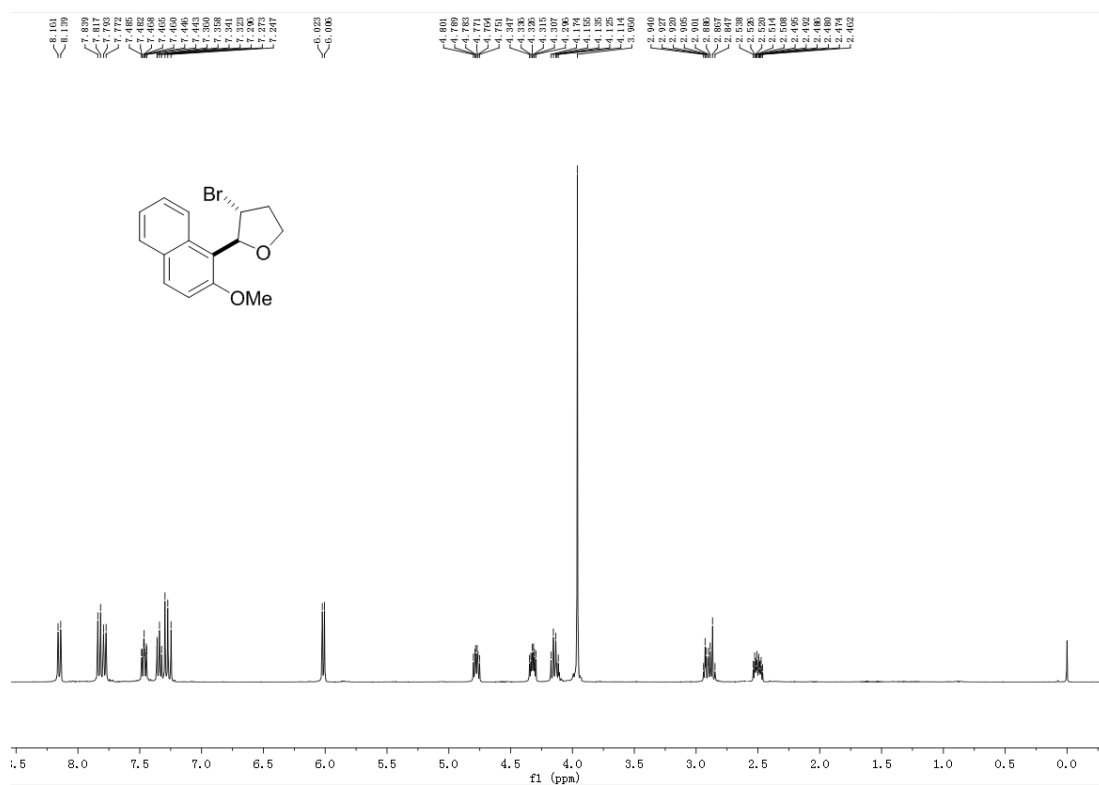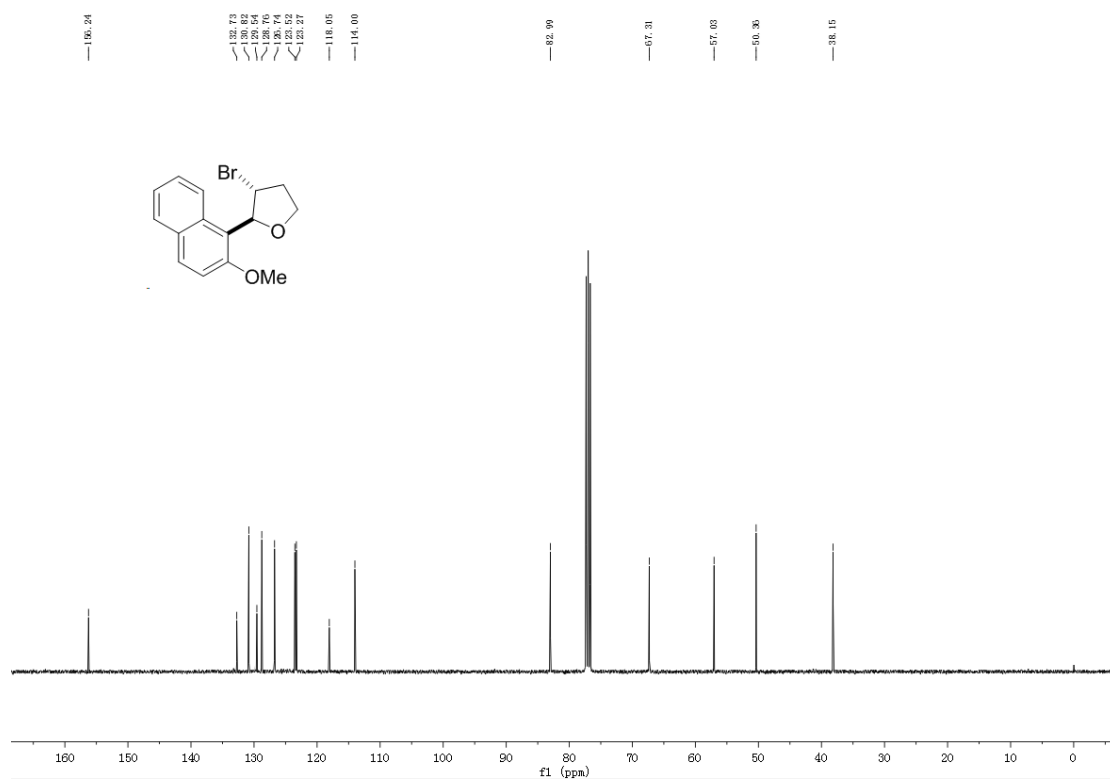

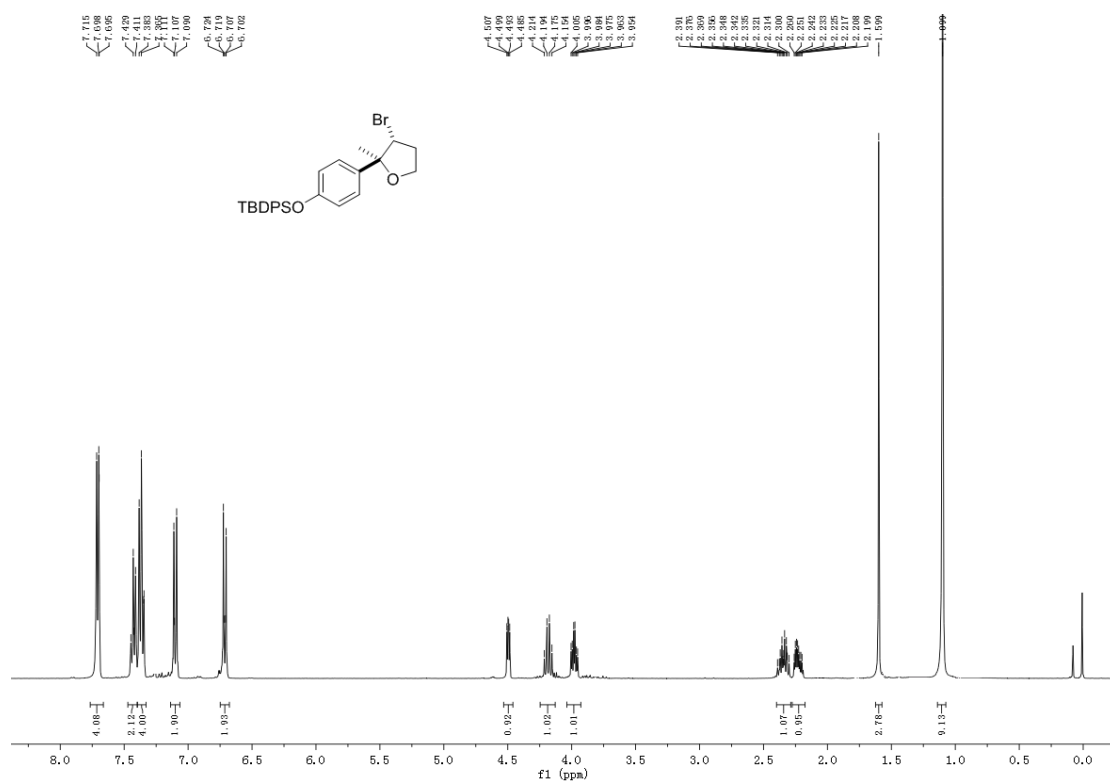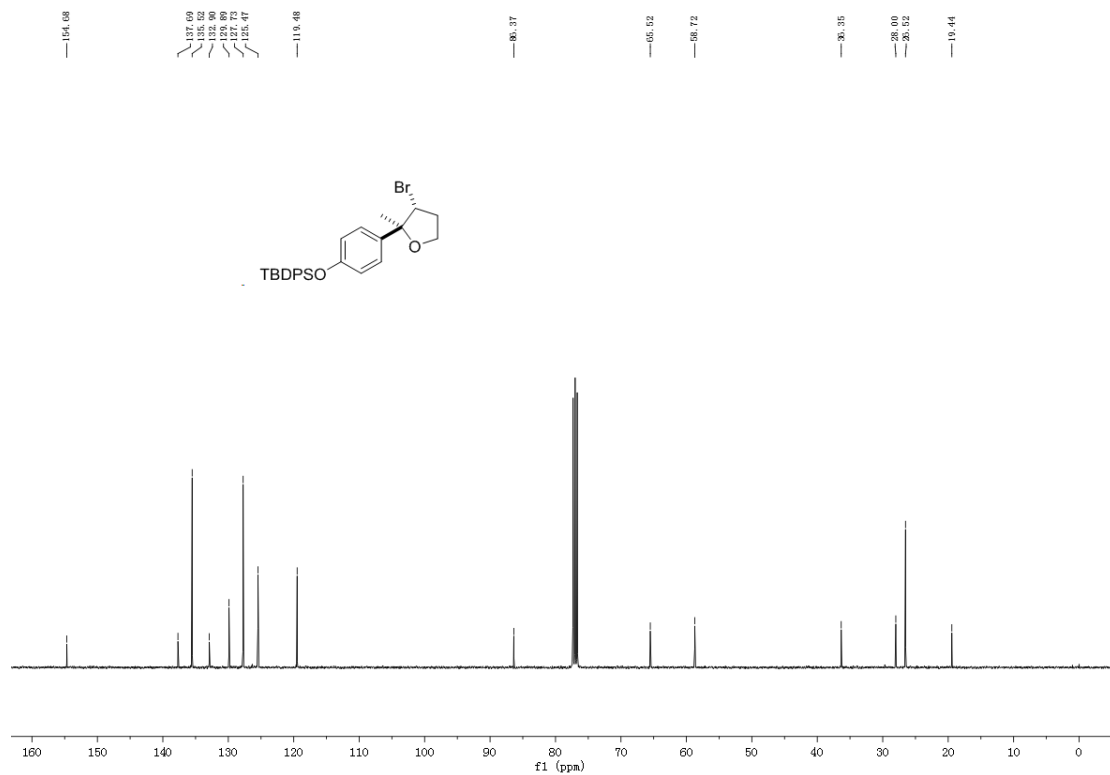



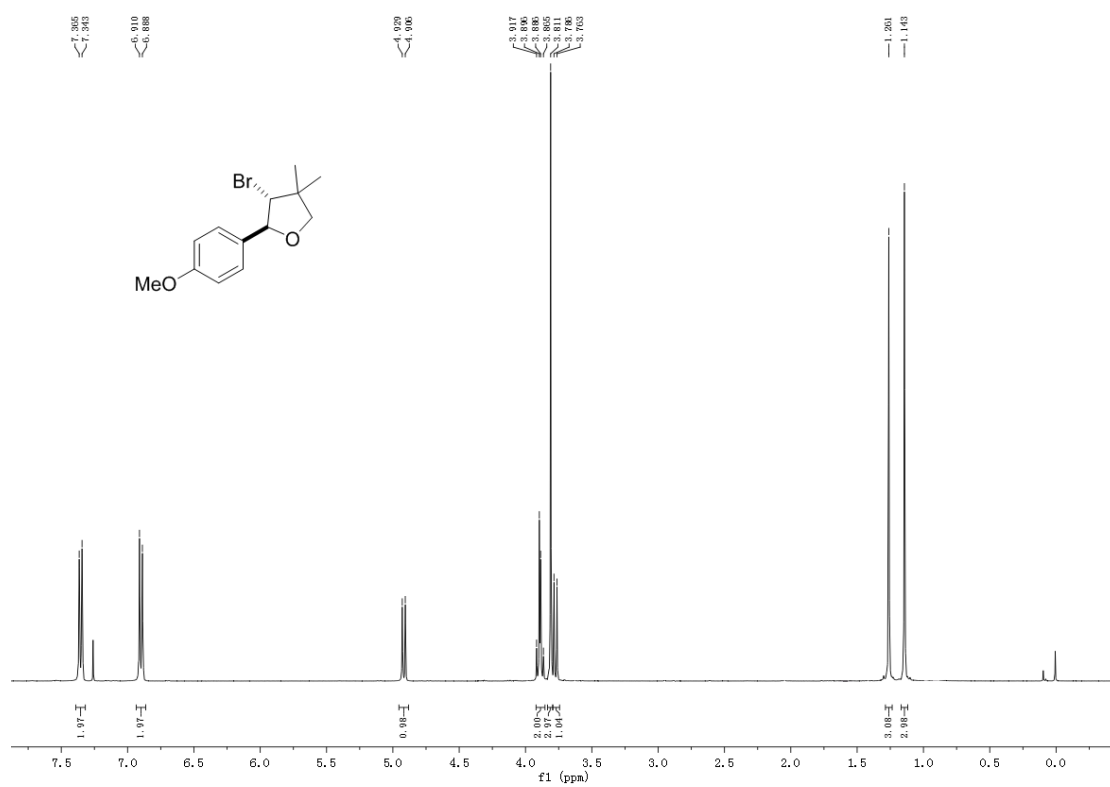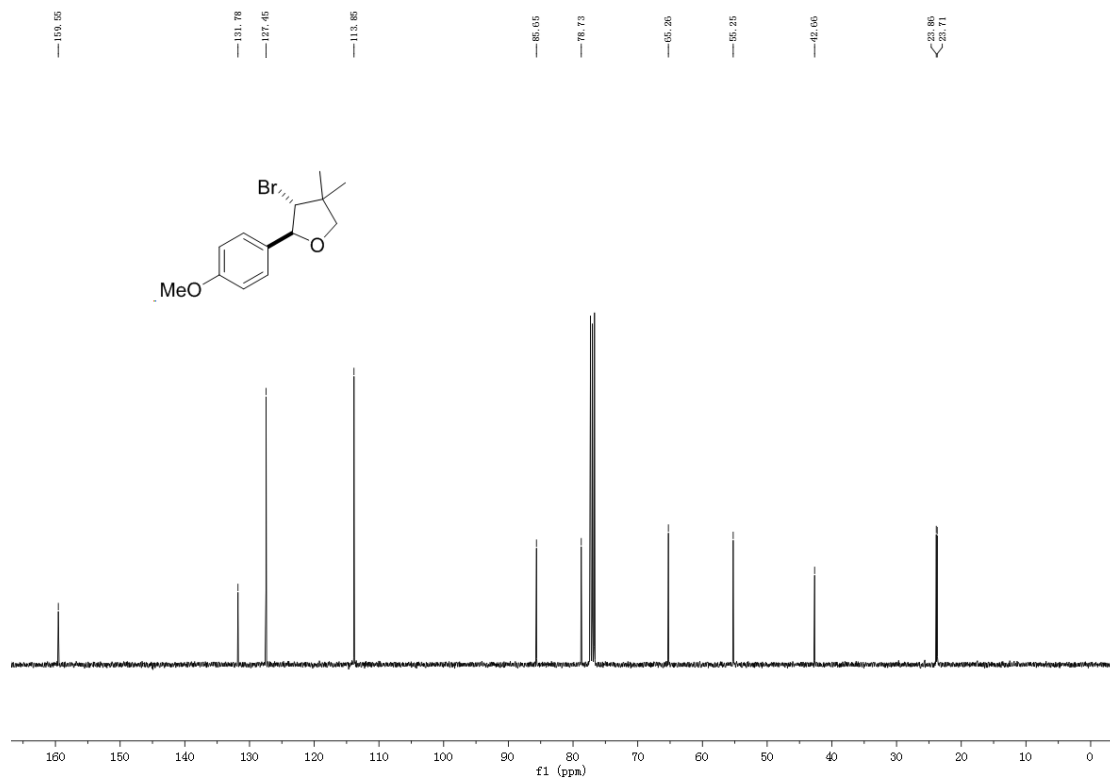

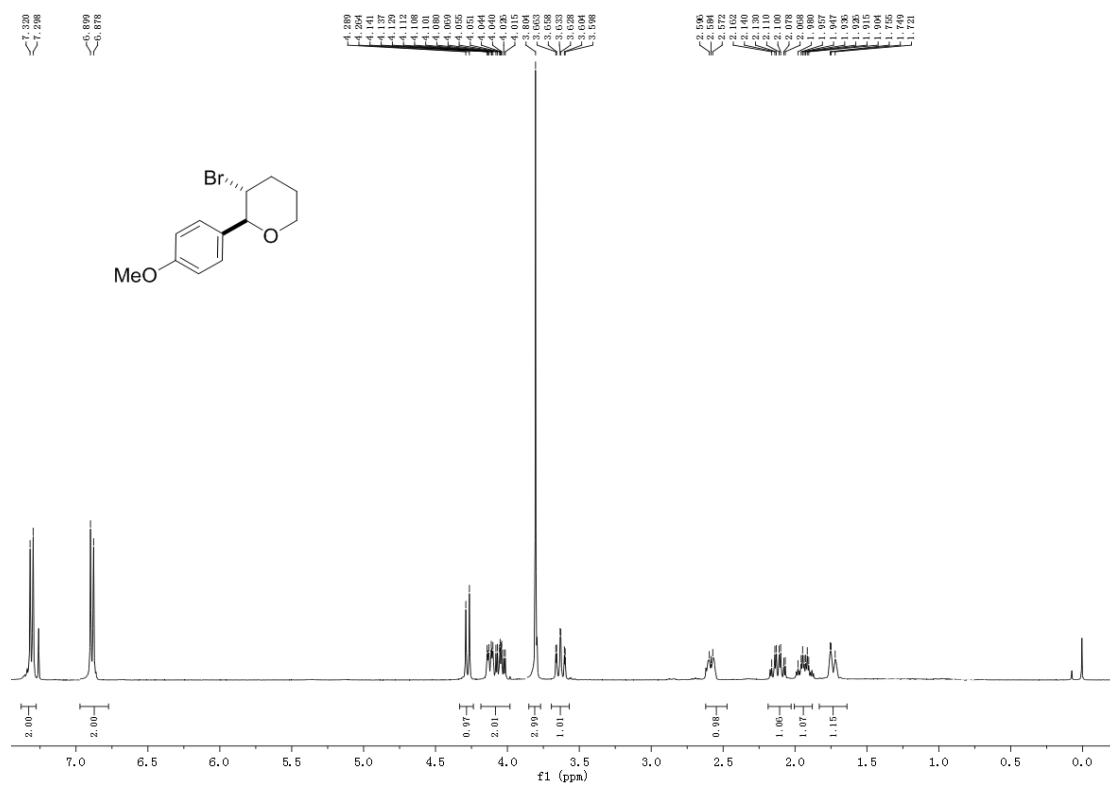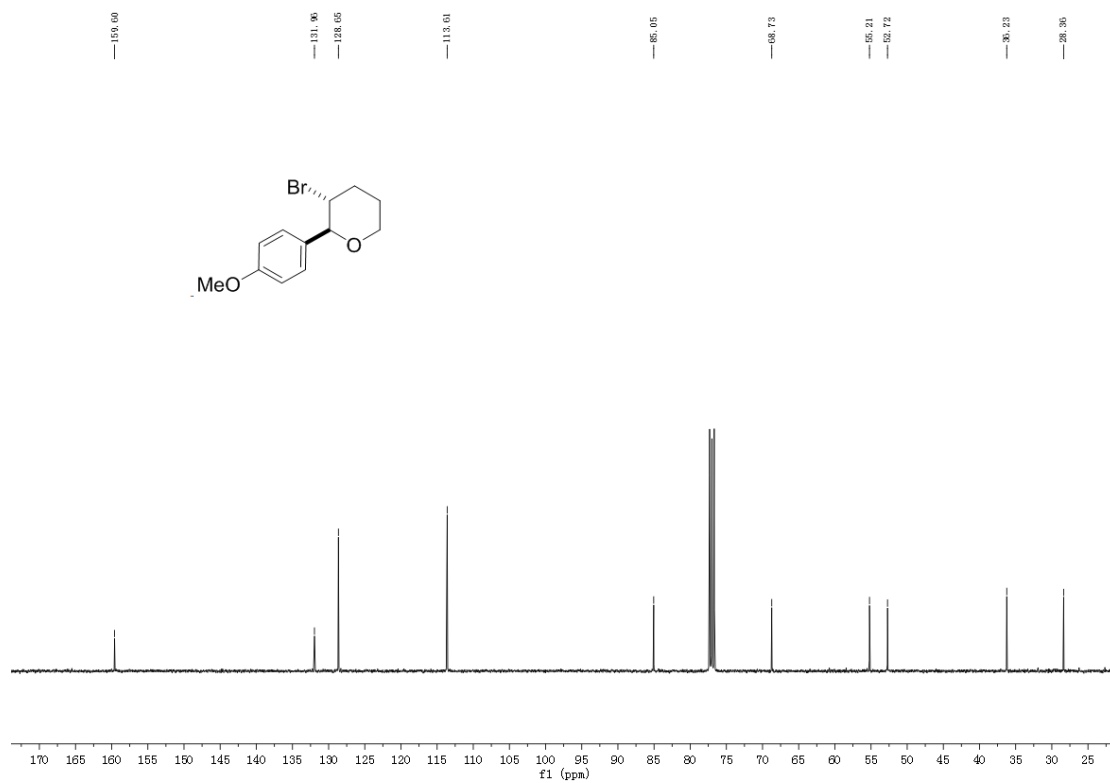

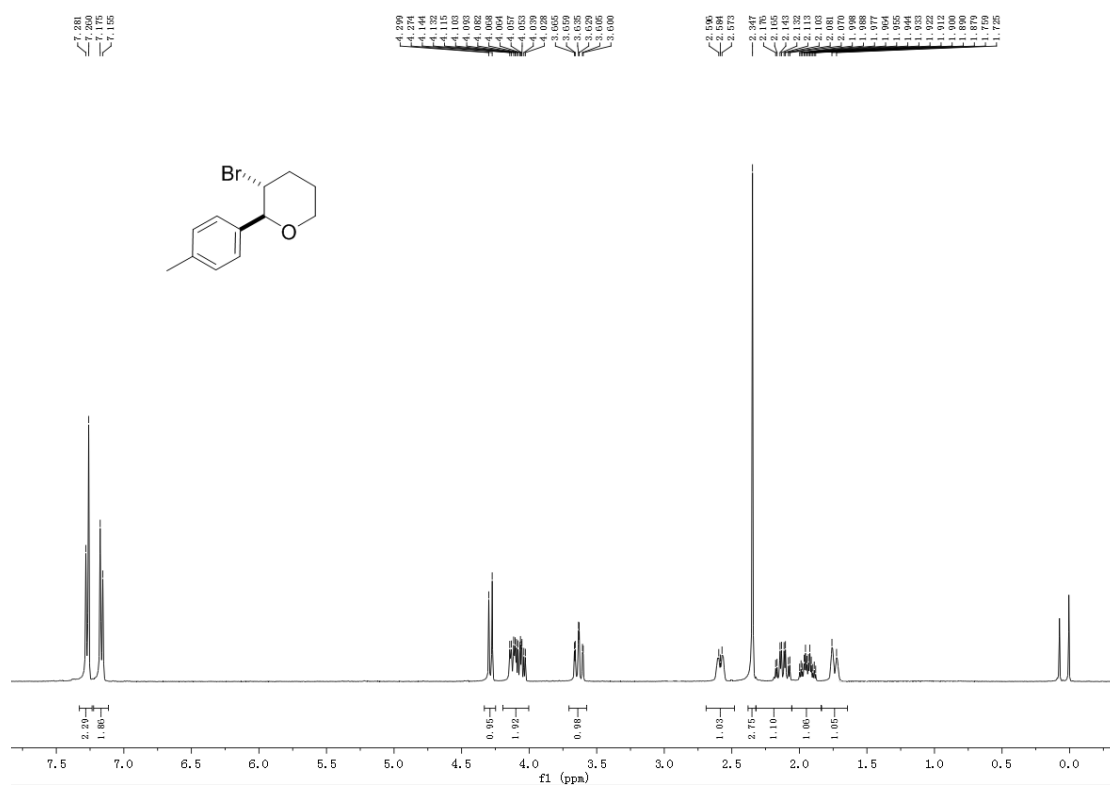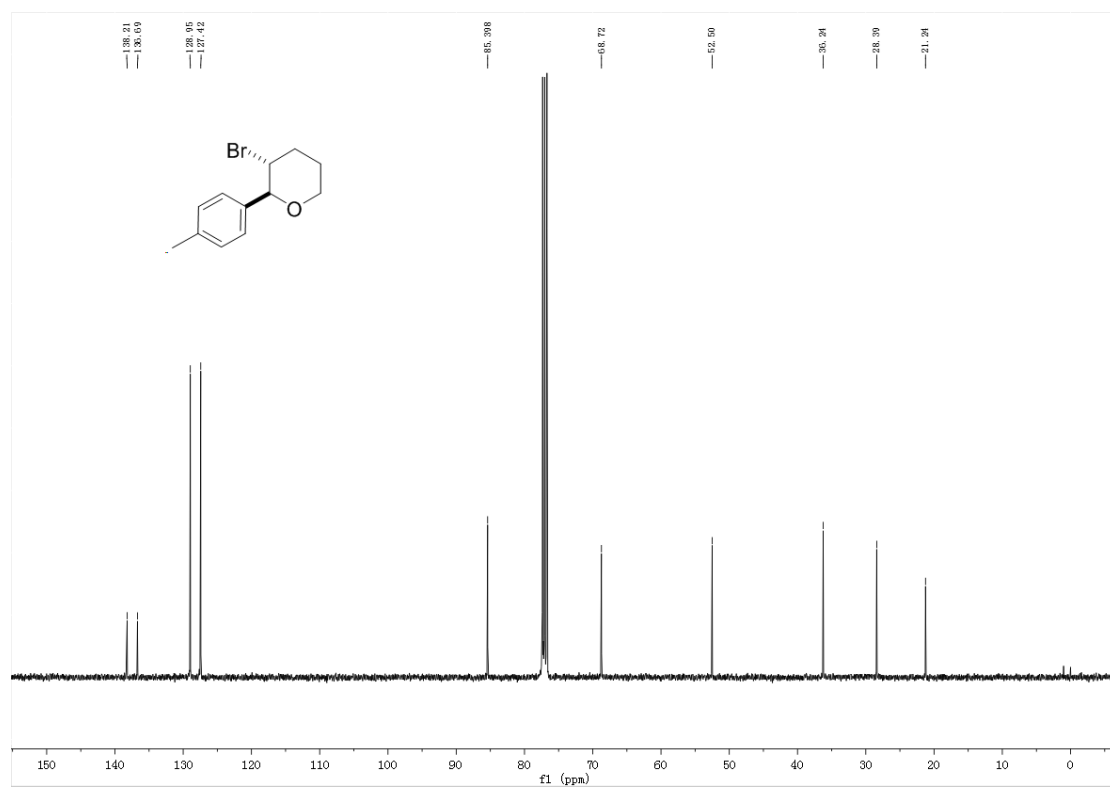



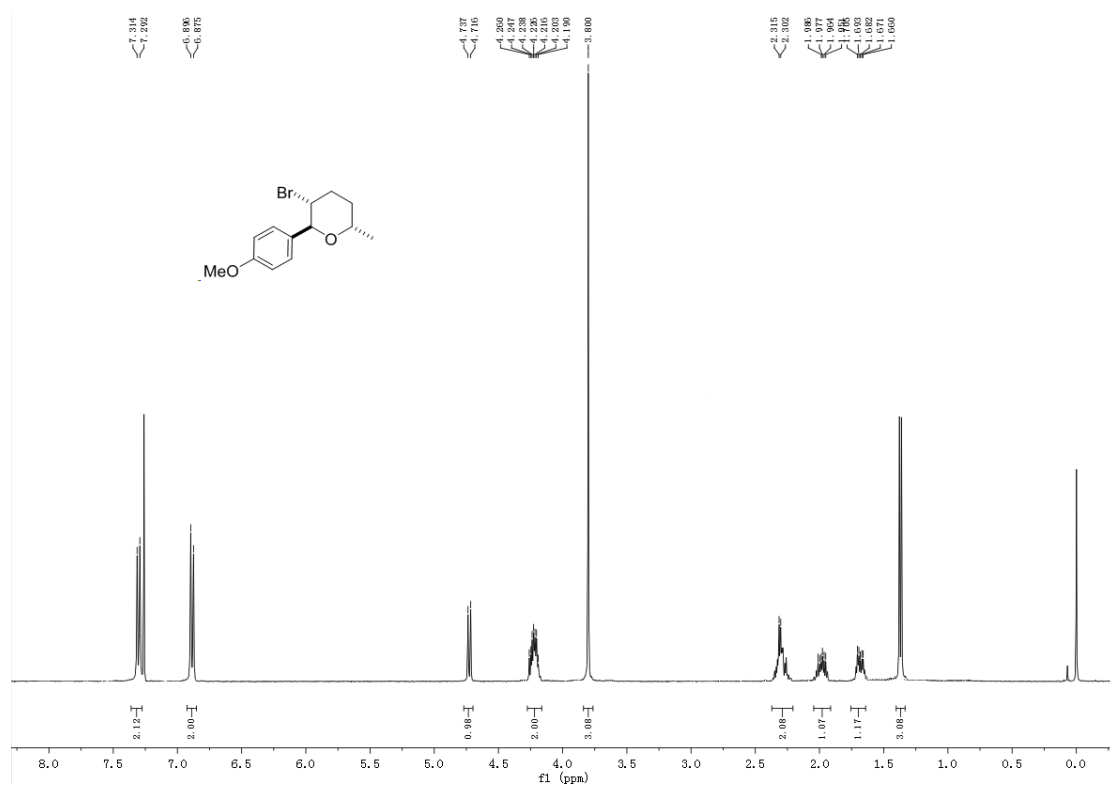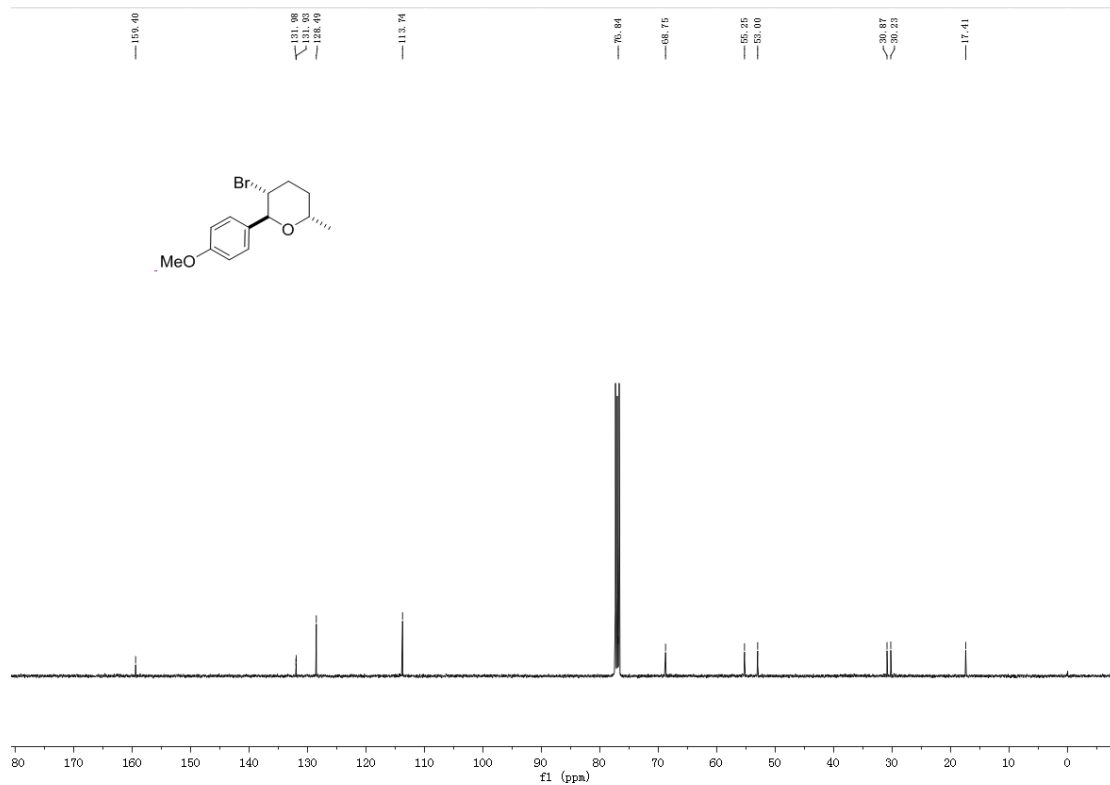

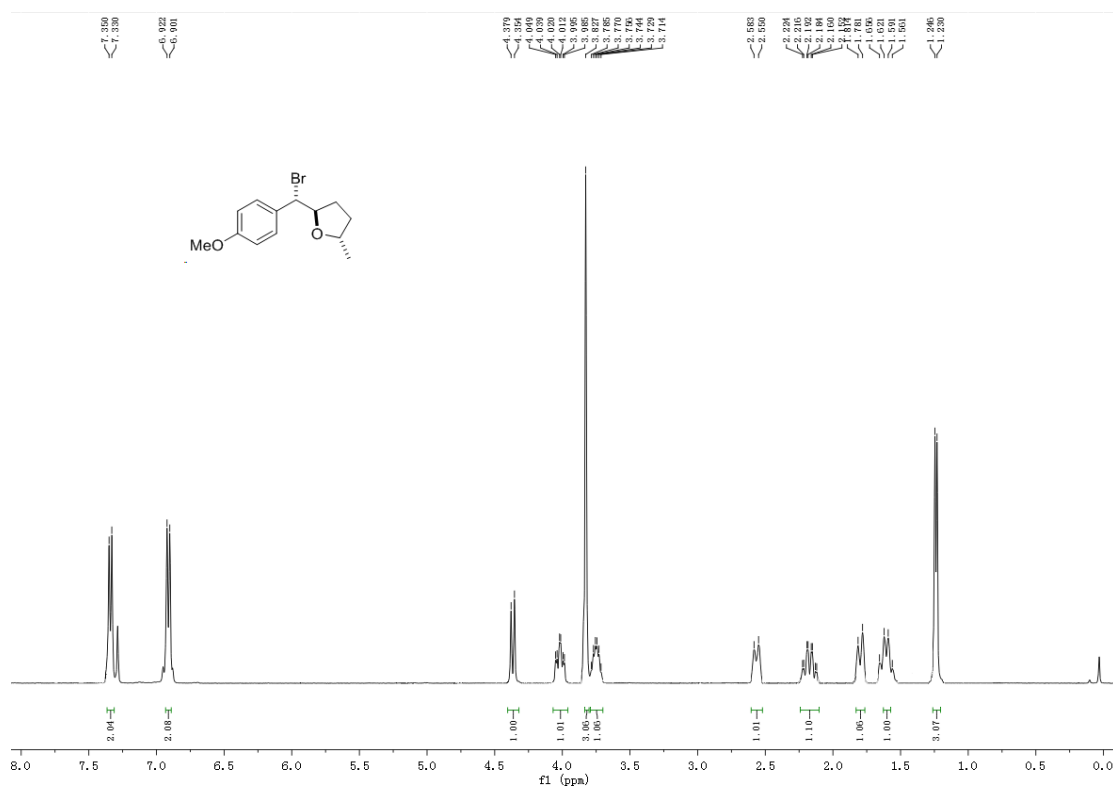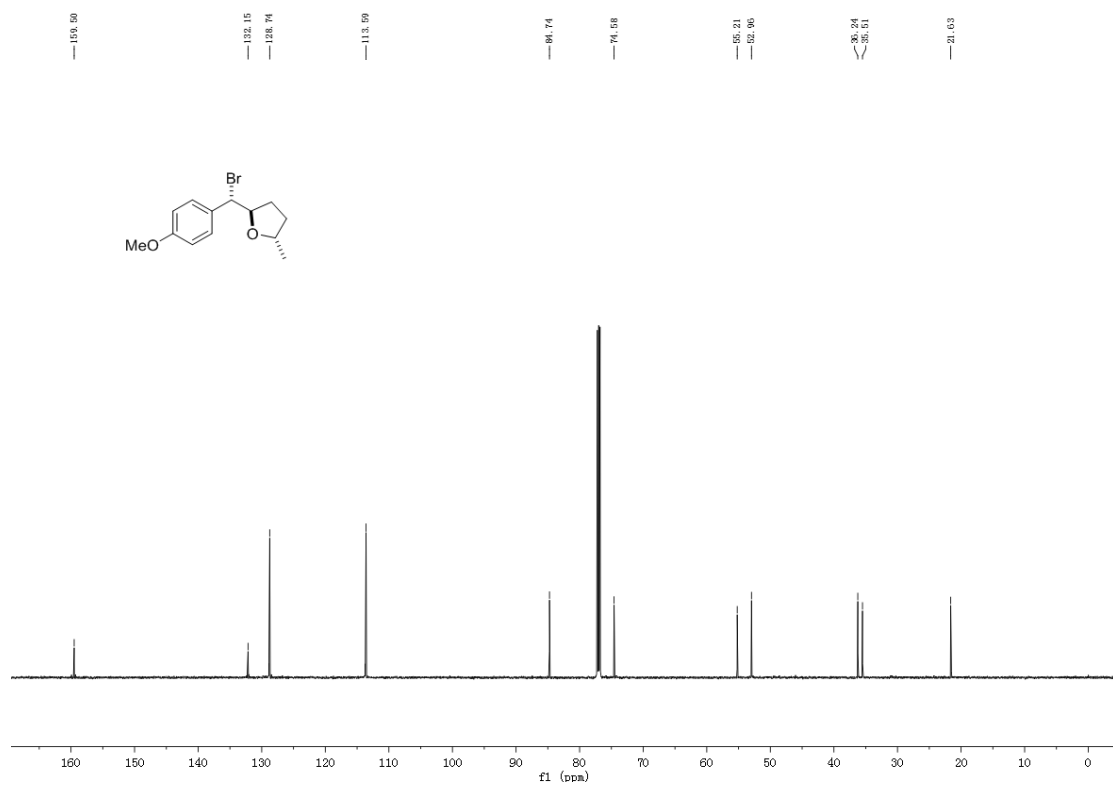

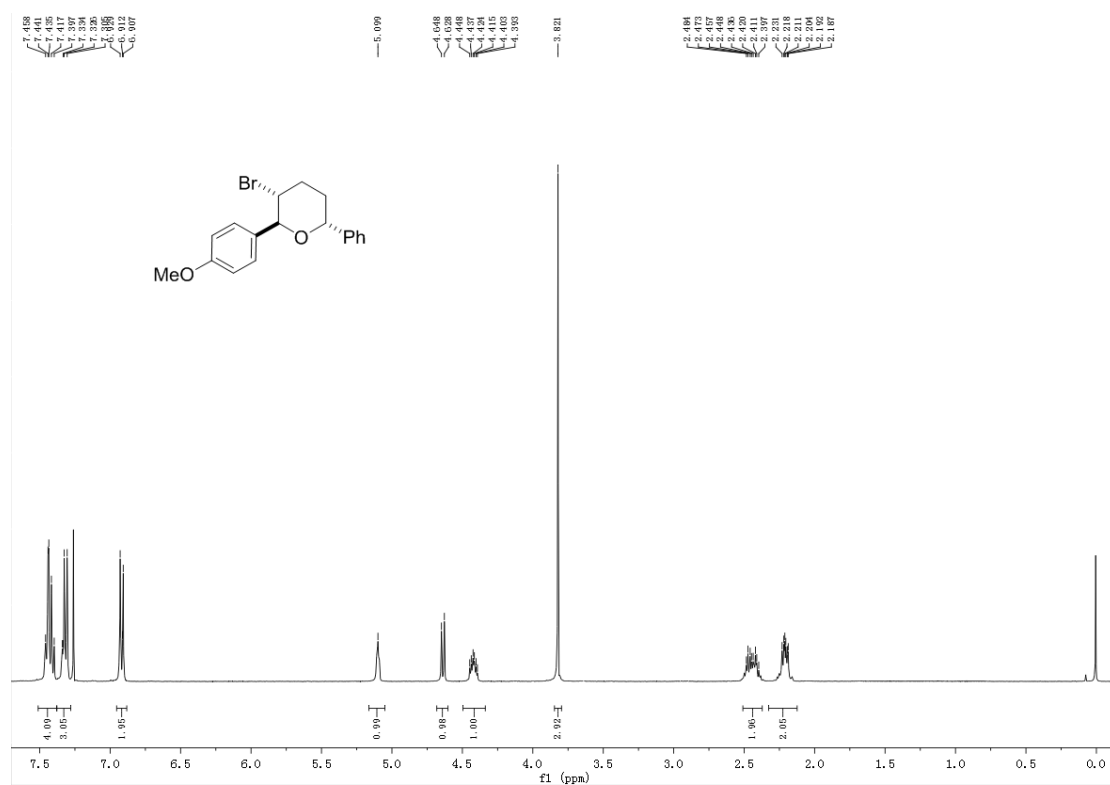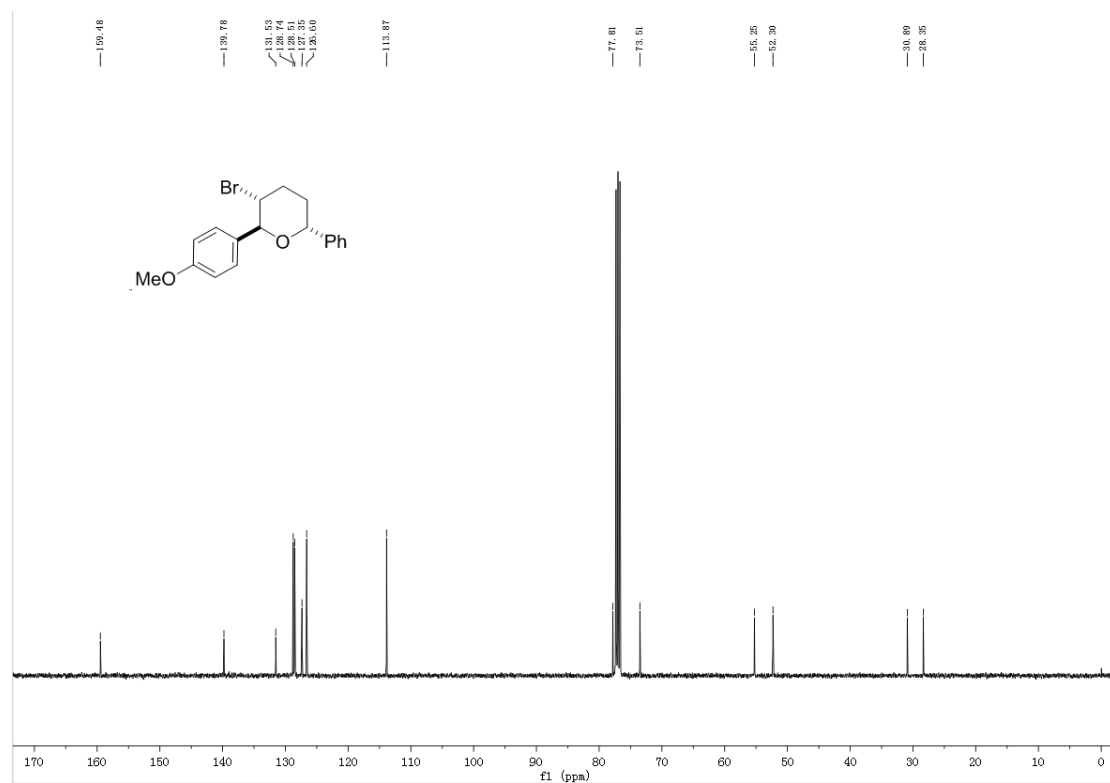

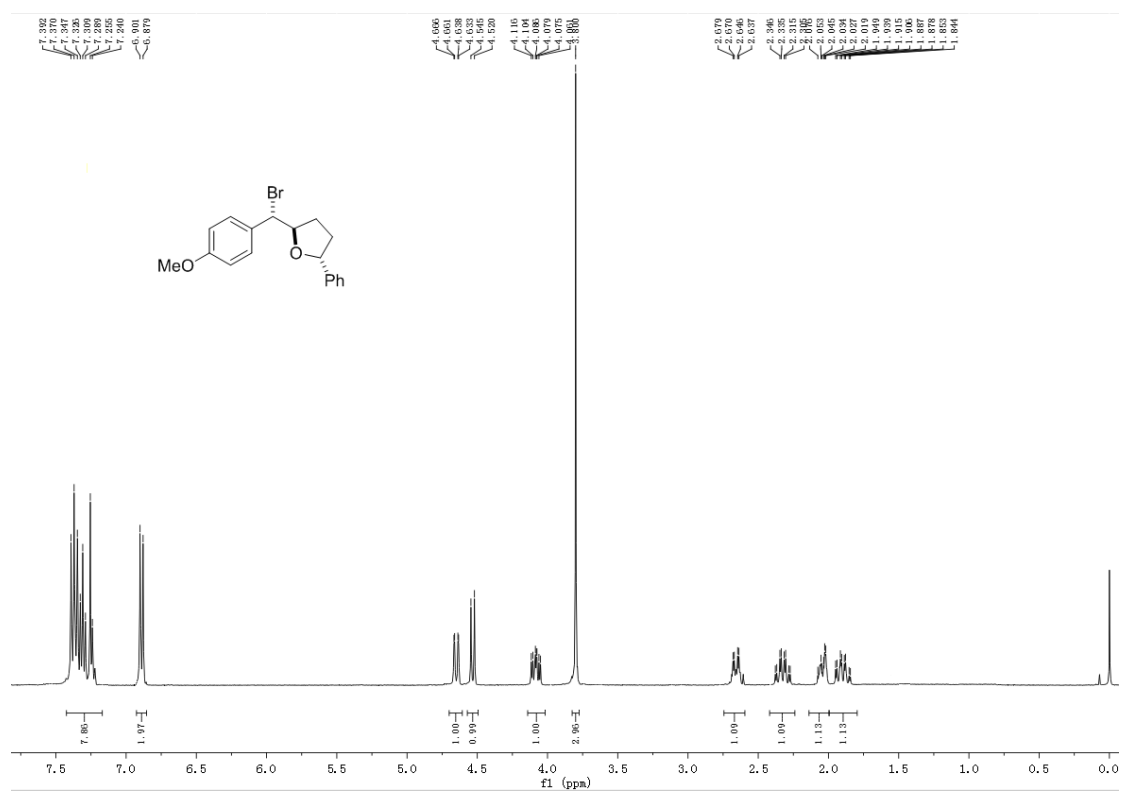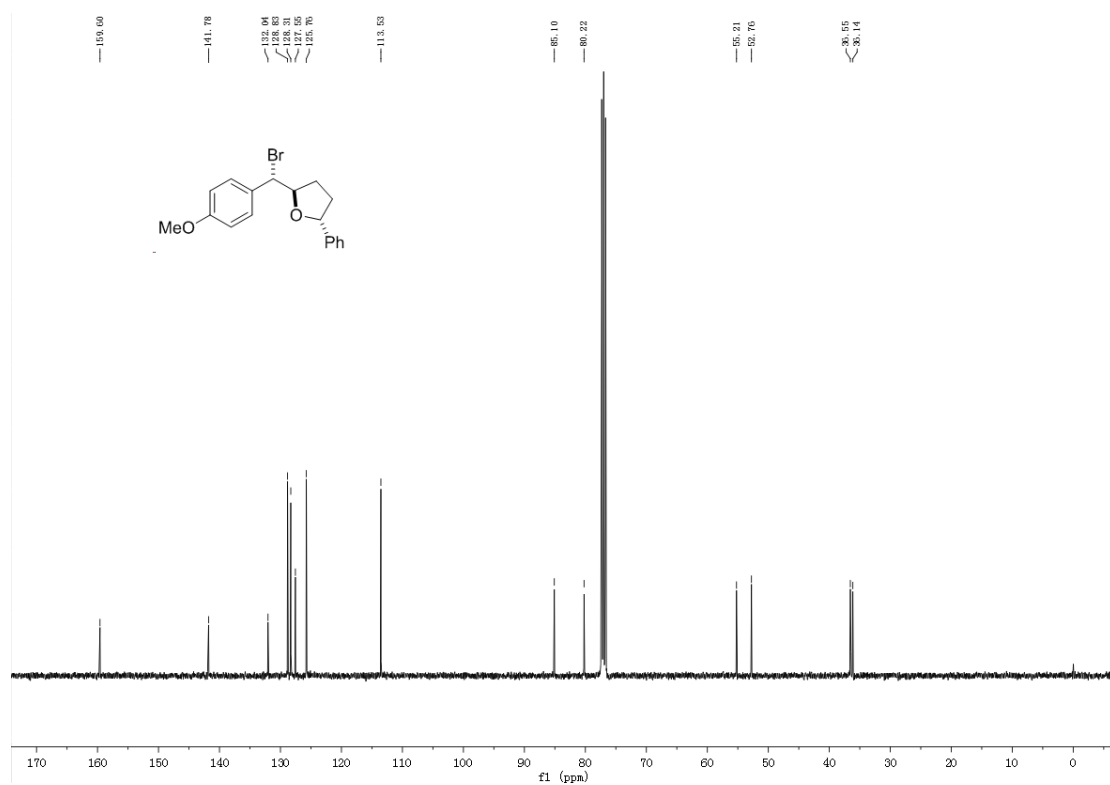

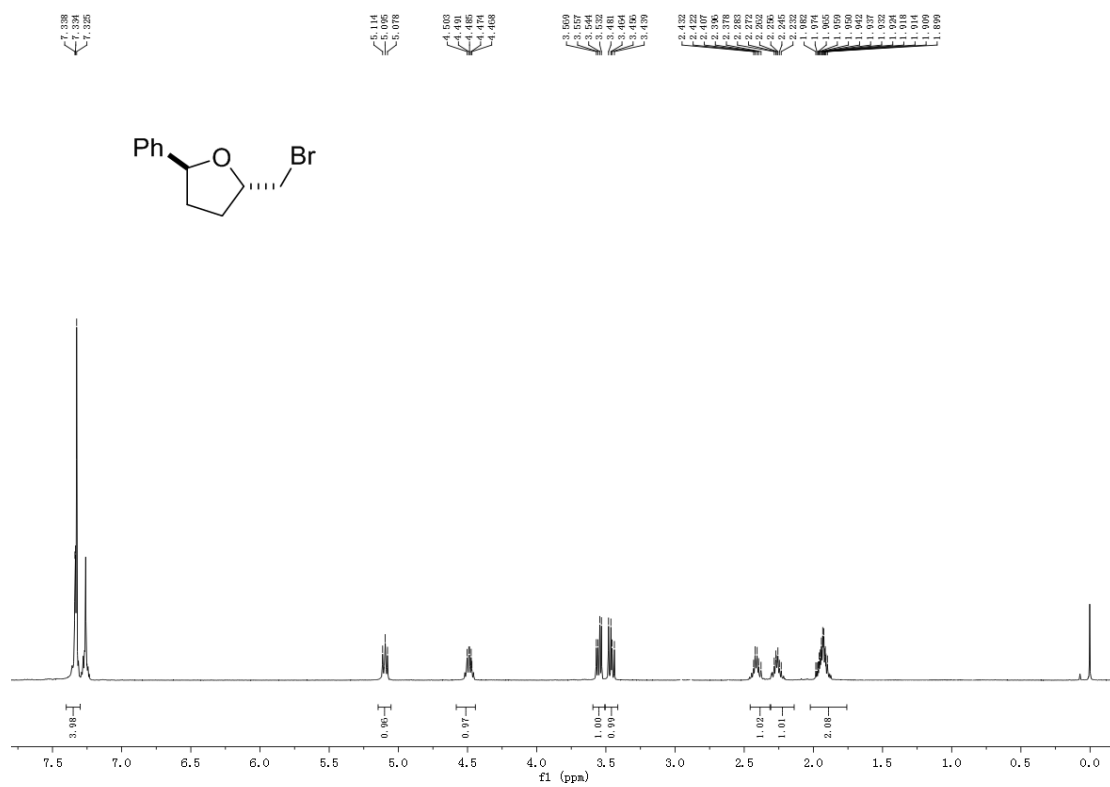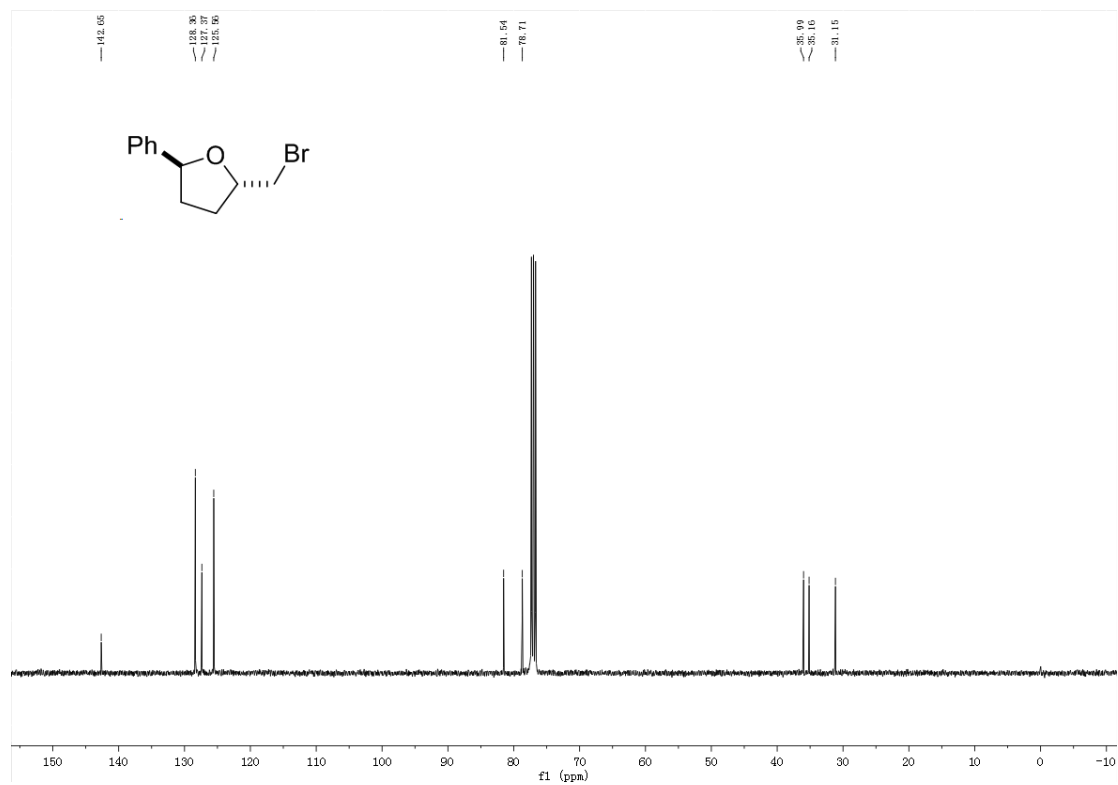

Supplement: Additional file 1 [file 1860-5397-11-5-S1.pdf]
